1 **Three components of glucose dynamics – value, variability, and**  
2 **autocorrelation – are independently associated with coronary plaque**  
3 **vulnerability**

4  
5 **Authors**

6 Hikaru Sugimoto,<sup>1</sup> Ken-ichi Hironaka,<sup>2</sup> Tomoko Yamada,<sup>3</sup> Natsu Otowa-Suematsu,<sup>3</sup> Yushi  
7 Hirota,<sup>3</sup> Hiromasa Otake,<sup>4</sup> Ken-Ichi Hirata,<sup>3</sup> Kazuhiko Sakaguchi,<sup>3</sup> Wataru Ogawa,<sup>3\*</sup> and  
8 Shinya Kuroda<sup>1,2,5\*</sup>

9  
10 **Affiliations**

11 <sup>1</sup>Department of Biochemistry and Molecular Biology, Graduate School of Medicine, The  
12 University of Tokyo, 7-3-1 Hongo, Bunkyo-ku, Tokyo 113-0033, Japan

13 <sup>2</sup>Department of Biological Sciences, Graduate School of Science, The University of Tokyo,  
14 7-3-1 Hongo, Bunkyo-ku, Tokyo 113-0033, Japan

15 <sup>3</sup>Division of Diabetes and Endocrinology, Department of Internal Medicine, Kobe University  
16 Graduate School of Medicine, Kusunoki-cho 7-5-1, Chuo-ku, Kobe, Hyogo 650-0017, Japan

17 <sup>4</sup>Division of Cardiovascular Medicine, Department of Internal Medicine, Kobe University  
18 Graduate School of Medicine, Kusunoki-cho 7-5-1, Chuo-ku, Kobe, Hyogo 650-0017, Japan

19 <sup>5</sup>Lead contact

20  
21 \*Corresponding authors: Wataru Ogawa, [ogawa@med.kobe-u.ac.jp](mailto:ogawa@med.kobe-u.ac.jp); Shinya Kuroda,  
22 [skuroda@bs.s.u-tokyo.ac.jp](mailto:skuroda@bs.s.u-tokyo.ac.jp)

23

24 **SUMMARY**

25 Impaired glucose homeostasis leads to many complications, with coronary artery disease  
26 (CAD) being a major contributor to healthcare costs. However, current CAD screening  
27 methods lack efficacy. Here, we predicted CAD using easy-to-measure indices, including  
28 continuous glucose monitoring (CGM)-derived indices. We found that CGM-derived indices,  
29 particularly ADRR and AC\_Var, exhibited stronger predictive capabilities for CAD  
30 compared to commonly used diabetes diagnostic indices such as fasting blood glucose  
31 (FBG), hemoglobin A1C (HbA1c), and plasma glucose level at 120 min during oral glucose  
32 tolerance tests (PG120). Factor analysis identified three distinct components underlying  
33 glucose dynamics – value, variability, and autocorrelation – each independently associated  
34 with CAD. Remarkably, ADRR was influenced by the first two components, and AC\_Var  
35 was influenced by the third component. FBG, HbA1c, and PG120 were influenced only by  
36 the value component, making them insufficient for CAD prediction. CGM-derived indices  
37 reflecting the three components can outperform traditional diabetes diagnostic methods in  
38 CAD prediction. (150/150 words)

39

40 **Keywords:** Continuous glucose monitoring; oral glucose tolerance test; virtual histology-  
41 intravascular ultrasound; coronary artery disease

42

43

## 44 INTRODUCTION

45 Diabetes mellitus (DM) leads to a variety of complications, primarily caused by vascular  
46 damage.<sup>1</sup> Among the complications, coronary artery disease (CAD) accounts for a large  
47 fraction of the morbidity, mortality, and healthcare costs in patients with type 2 DM  
48 (T2DM).<sup>2</sup> Various prognostic models<sup>1,3</sup> and diagnostic markers<sup>2</sup> have been developed to  
49 predict CAD; however, screening of CAD can be ineffective, costly, or laborious.<sup>2,4</sup> More  
50 effective approaches for identifying individuals at high risk for complications using readily  
51 obtained clinical variables are warranted.

52 Blood glucose levels are among the readily obtained predictors of the  
53 complications.<sup>5</sup> The disrupted conditions of glucose dynamics seen in impaired glucose  
54 tolerance (IGT) and T2DM are partly characterized by high concentrations of blood glucose  
55 levels.<sup>6</sup> High concentrations of blood glucose levels have been defined as having high  
56 hemoglobin A1c (HbA1c) levels, fasting blood glucose (FBG) levels, and plasma glucose  
57 concentration at 120 min during the oral glucose tolerance test (OGTT) (PG120).<sup>6</sup> These  
58 indices, especially HbA1c, are associated with complications of T2DM.<sup>7</sup>

59 Beyond the absolute value of glucose concentration, glucose variability also  
60 contributes to the prognosis of the complications<sup>5,6,8–11</sup> and all-cause mortality.<sup>12</sup> Continuous  
61 glucose monitoring (CGM) can estimate short-term glycemic variability,<sup>13</sup> and is reportedly  
62 able to predict T2DM complications.<sup>14</sup> Standard deviation (Std) of glucose levels  
63 (CGM\_Std), mean amplitude of glycemic excursion (MAGE), mean of daily difference  
64 (MODD), and continuous overlapping net glycemic action (CONGA) are established indices  
65 of glycemic variability, of which CGM\_Std and MAGE are more highly correlated with  
66 coronary plaque properties.<sup>15</sup> Among glucose level-related indices, including HbA1c and  
67 FBG, MAGE is an independent determinant of coronary plaque instability.<sup>16</sup>

68 Other CGM-derived indices such as average daily risk ratio (ADRR), lability index  
69 (LI), J-index, mean absolute glucose (MAG), and glycemic risk assessment in diabetes

70 equation (GRADE) have also been developed.<sup>17</sup> We recently showed that AC\_Mean and  
71 AC\_Var, which are calculated from the autocorrelation function of glucose levels measured  
72 by CGM, can detect decreased abilities in glucose regulation that cannot be captured by FBG,  
73 HbA1c, or the other conventional CGM-derived indices.<sup>18</sup> The characteristics of glucose  
74 dynamics can also be estimated from insulin concentrations. The disposition index (DI),  
75 which is the product of insulin sensitivity and insulin secretion, reflects and predicts glycemic  
76 disability beyond FBG.<sup>19</sup> Several other glucose-related indices have also been reported;  
77 however, how these indices can be combined to deduce T2DM complications including CAD  
78 has yet to be established.

79 The objectives of this study were to determine (1) which clinical parameters are  
80 particularly useful in predicting CAD, (2) what factors underlie these indices, and (3) how  
81 these factors are associated with CAD. We investigated the characteristics of 14 CGM-  
82 derived indices: 12 relatively well-known CGM-derived indices<sup>17</sup> and 2 indices (AC\_Mean  
83 and AC\_Var) as well as OGTT-derived indices, and investigated the relationship between  
84 these parameters and coronary plaque vulnerability assessed by virtual histology-  
85 intravascular ultrasound (VH-IVAS), a strong predictor of coronary events. We showed that  
86 CGM-derived indices are particularly useful in the prediction. In addition, we showed that  
87 three components, namely, value, variability, and autocorrelation, underly blood glucose  
88 level-related indices, and that the three are independently associated with coronary plaque  
89 vulnerability.

90

## 91 **RESULTS**

### 92 **CGM\_Mean, CGM\_Std, and AC\_Var independently contribute to the prediction of** 93 **coronary plaque vulnerability**

94 To characterize CGM-derived indices in estimating the risk of CAD, we examined  
95 Spearman's correlation coefficients ( $r$ ) between CGM-derived indices and the ratio of

96 necrotic core to total plaque volume (%NC) (Figs. 1A, S1). %NC, a widely used parameter of  
97 plaque vulnerability, was assessed by VH-IVUS. We performed this analysis using a  
98 previously described cohort consisting of 8 individuals with normal glucose tolerance (NGT),  
99 16 with IGT, and 29 with T2DM.<sup>15</sup> For comparison, we also investigated FBG, HbA1c,  
100 OGTT-derived indices, body mass index (BMI), triglycerides (TGs), low-density lipoprotein  
101 cholesterol (LDL-C), high-density lipoprotein cholesterol (HDL-C), systolic blood pressure  
102 (SBP), and diastolic BP (DBP).

103 Twelve CGM-derived indices, namely, ADRR, MAGE, JINDEX, CGM\_Std (Std of  
104 glucose levels measured by CGM), CGM\_Mean (mean glucose levels measured by CGM),  
105 GRADE, MVALUE, AC\_Var, LI, HBGI, CONGA, and MODD, exhibited significant  
106 correlations with %NC (Fig. 1A). By contrast, with the exception of the insulinogenic index  
107 (I.I.), OGTT-derived indices, as well as other indices including FBG and HbA1c, displayed  
108 relatively weak correlations with %NC (Fig. 1A, blue, magenta, and green), suggesting that  
109 CGM-derived indices are effective in predicting %NC. Of note, this study enrolled  
110 individuals with well-controlled serum cholesterol and BP levels (Fig. S2). The weak  
111 correlations between cholesterol and BP-related indices and %NC (Fig. 1A) do not mean that  
112 cholesterol and BP are not associated with %NC. Consequently, our subsequent analysis  
113 focused primarily on indices unrelated to cholesterol and BP.

114 For a more comprehensive assessment of the association among clinical parameters,  
115 we constructed a correlation network connecting relationships with  $Q < 0.05$  (Fig. 1B). The  $Q$   
116 values were calculated by Spearman's correlation test followed by multiple testing  
117 adjustment using the Benjamini-Hochberg method. The correlation network showed that  
118 AC\_Var was statistically significantly correlated with %NC ( $r = 0.35$ ; 95% confidence  
119 interval [CI], 0.09–0.57) (Fig. 1B). By contrast, AC\_Var displayed relatively weak  
120 correlations with other indices, including CGM\_Mean ( $r = -0.02$ ; 95% CI, -0.30–0.24) and  
121 CGM\_Std ( $r = 0.15$ ; 95% CI, -0.14–0.43) (Fig. 1B, C).

122 We previously reported that AC\_Var, calculated from the autocorrelation function of  
123 glucose levels, can capture glucose handling capacities that cannot be captured by  
124 conventional CGM-derived indices including CGM\_Mean and CGM\_Std.<sup>18</sup> Based on the  
125 study, we hypothesized that AC\_Var can identify individuals with high %NC independently  
126 from CGM\_Mean and CGM\_Std. To test this hypothesis, we conducted multiple regression  
127 analysis with CGM\_Mean, CGM\_Std, and AC\_Var as input variables and %NC as the  
128 objective variable (Fig. 1D). The variance inflation factor (VIF), an index of  
129 multicollinearity, for CGM\_Mean, CGM\_Std, and AC\_Var was 1.1, 1.1, and 1.0,  
130 respectively, suggesting that CGM\_Mean, CGM\_Std, and AC\_Var had low multicollinearity  
131 with each other. The  $R^2$  of the model that predicted %NC from the three indices was 0.36.  
132 CGM\_Mean, CGM\_Std, and AC\_Var had statistically significant independent positive  
133 correlations with %NC (Fig. 1D), suggesting that CGM\_Mean, CGM\_Std, and AC\_Var are  
134 independently associated with %NC. Notably, the  $R^2$  of the model that predicted %NC from  
135 FBG, HbA1c, and PG120, which have been used as diagnostic markers of diabetes, was only  
136 0.05 (Fig. 1D). Multivariate analyses including other indices also indicated that AC\_Mean  
137 and AC\_Var had relatively low multicollinearity with other CGM-derived indices  
138 (Supplementary text). Collectively, we conclude that CGM-derived indices are useful for  
139 predicting %NC compared to indices used for diabetes diagnosis, and that CGM\_Mean,  
140 CGM\_Std, and AC\_Var independently contribute to the prediction of %NC.

141

### 142 **CGM-derived indices, particularly ADRR, AC\_Var, MAGE, and LI are effective in** 143 **predicting coronary plaque vulnerability**

144 To avoid overfitting and investigate which input variables are particularly useful in  
145 estimating %NC, we performed Least Absolute Shrinkage and Selection Operator (LASSO)  
146 regression (Fig. 2).<sup>20</sup> LASSO uses L1 regularization to produce models with fewer  
147 parameters and has been widely applied to feature selection in predictive modeling.<sup>21</sup> We

148 included BMI, FBG, HbA1c, OGTT-derived indices, and CGM-derived indices as the input  
149 variables. The leave-one-out cross-validation identified the optimal regularization coefficient,  
150 lambda, as 0.849 (Fig. 2A). At the lambda, the coefficients of ADRR, AC\_Var, MAGE, and  
151 LI were estimated to be non-zero coefficients (Fig. 2B, C), suggesting that CGM-derived  
152 indices, particularly ADRR, AC\_Var, MAGE, and LI, contribute to the prediction of %NC.  
153 Even with the inclusion of SBP, DBP, TG, LDL-C, and HDL-C as additional input variables,  
154 the results remained consistent, with the coefficients of ADRR, AC\_Var, MAGE, and LI still  
155 estimated as non-zero coefficients (Fig. S4).

156 To further validate the results of the LASSO, we also performed Partial Least  
157 Squares (PLS) regression and investigated the VIP scores<sup>22</sup> (Fig. 2D). The VIP scores of  
158 ADRR, AC\_Var, MAGE, and LI, which were estimated to be non-zero coefficients by  
159 LASSO, were higher than 1, indicating that these four variables especially contribute to the  
160 prediction of %NC.

161

162 **Three components of dysglycemia – high value, high variability, and low**  
163 **autocorrelation – are associated with coronary plaque vulnerability**

164 To identify factors underlying the clinical parameters and investigate how these factors are  
165 associated with %NC, we conducted exploratory factor analysis. Factor analysis reduces  
166 interrelated indices into a smaller set of underlying common factors, and has been employed  
167 to examine the interdependencies among various clinical parameters<sup>23–25</sup> and DM  
168 complications.<sup>26</sup>

169 To determine the optimal number of underlying factors, we investigated Bayesian  
170 information criterion (BIC) and minimum average partial (MAP) methods, indicating that  
171 five or six factors were appropriate, respectively. We first set the number of underlying  
172 factors as 5. Figure 3A indicates that FBG, HbA1c, PG120, I.I., oral DI, CGM\_Mean,  
173 CONGA, HBGI, MVALUE, GRADE, JINDEX, and ADRR clustered as factor 1. Given that

174 most of these indices are related to the value of blood glucose concentration, factor 1 was  
175 labeled “value.” CGM\_Std, MAGE, LI, MAG, MODD, JINDEX, and ADRR clustered as  
176 factor 2. Given that these indices are related to glucose variability, factor 2 was labeled  
177 “variability.” Given that the definition of JINDEX is based on the sum of CGM\_Mean and  
178 CGM\_Std, and that of ADRR is based on both high and low values of glucose, the result that  
179 JINDEX and ADRR clustered in both factors 1 and 2 is plausible. Given that autocorrelation-  
180 derived indices, AC\_Mean and AC\_Var, clustered as factor 3, factor 3 was labeled  
181 “autocorrelation.” BMI, PG120, composite index, and oral DI clustered as factor 4. Factor 4  
182 did not include any CGM-derived indices. Given that this combination of indices indicates a  
183 decrease in oral DI and associated increase in blood glucose due to decreased insulin  
184 sensitivity, factor 4 was labeled “sensitivity (without CGM)”. PG120, I.I., oral DI, and MAG  
185 clustered as factor 5. Factor 5 did not have positive loadings of any CGM-derived indices.  
186 Given that this combination of the indices indicates a decrease in oral DI and associated  
187 increase in blood glucose due to decreased insulin secretion (I.I.), factor 5 was labeled  
188 “secretion (without CGM).” The cumulative percentages of the total variance of the factors  
189 were 39%, 60%, 70%, 75%, and 80%, respectively.

190 The validity of the factor analysis was assessed according to previous studies.<sup>23,26</sup> To  
191 evaluate the applicability of the factor analysis, the Kaiser-Meyer-Olkin (KMO) and  
192 Bartlett’s spherical test were performed. The KMO test indicated that the value of the  
193 measure of sampling adequacy for this data was 0.64, and Bartlett’s spherical test indicated  
194 that the variables were statistically significantly intercorrelated ( $P < 0.01$ ), suggesting that  
195 this dataset was applicable for the factor analysis. To evaluate internal consistency,  
196 Cronbach’s  $\alpha$  (Fig. 3B) and item–total correlations were calculated for each factor.  
197 Cronbach’s  $\alpha$  was 0.97 for factor 1, 0.93 for factor 2, 0.90 for factor 3, 0.72 for factor 4, and  
198 0.66 for factor 5; these values were larger than 0.65 (Fig. 3B), suggesting that the internal  
199 consistency was satisfactory. While Cronbach’s  $\alpha$  of factor 5 was relatively low, exclusion of



200 MAG increased the Cronbach's  $\alpha$  to 0.84, indicating that the association between factor 5 and  
201 decrease in oral DI and associated increase in blood glucose due to decreased insulin  
202 secretion could be considered reliable. Item–total correlations ranged from 0.63 to 0.97 for  
203 factor 1, 0.72 to 0.94 for factor 2, 0.82 for factor 3, 0.54 to 0.76 for factor 4, and 0.37 to 0.86  
204 for factor 5. With the exception of MAG, item–total correlations ranged from 0.84 to 0.91 for  
205 factor 5. The correlation coefficient of MAG was 0.37, which can be considered a modest  
206 correlation,<sup>23</sup> and the item–total correlations were generally reasonably strong in  
207 demonstrating reliability.

208 We also investigated a 6-factor solution (Fig. S5A). Factors 1, 2, and 3 could be  
209 interpreted as value, variability, and autocorrelation, respectively, similar to the 5-factor  
210 solution. Given that factor 6 had no factor loadings  $\geq 0.3$ , we applied the 5-factor solution in  
211 the subsequent analysis. Furthermore, the inclusion of SBP, DBP, TG, LDL-C, and HDL-C  
212 into the input variables did not change the presence of the three components (value,  
213 variability, and autocorrelation) in glucose dynamics (Fig. S5B). Since we only included only  
214 individuals with well-controlled serum cholesterol and BP levels in this study, we applied the  
215 5-factor solution without these indices (Fig. 3A) to the following analysis.

216 To further examine the stability of the results of the factor analysis, we also  
217 conducted hierarchical clustering analysis (Fig. S6). The optimal number of clusters was  
218 determined based on silhouette analysis. A large positive silhouette coefficient indicates that  
219 each cluster is compact and distinct from the others. The analysis indicated that the four  
220 clusters were appropriate (Fig. S6A). Clusters 1, 2, and 3 can be interpreted as value,  
221 variability, and autocorrelation, respectively (Fig. S6B). This confirmed the consistency of  
222 the clustering analysis with the factor analysis.

223 To investigate the reproducibility of the factor analysis, we conducted factor  
224 analyses using the previously reported datasets (Fig. S7). Factors that can be interpreted as  
225 value, variability, and autocorrelation were observed in both the Japanese<sup>18</sup> (Fig. S7A) and

226 American<sup>27</sup> (Fig. S7B) datasets, suggesting the reproducibility of glucose dynamics with  
227 these three components.

228 To investigate the association between these underlying factors and %NC, we  
229 investigated the correlation between the factor scores and %NC (Fig. 3C). The factor value  
230 and variability showed significant positive correlations with %NC, whereas autocorrelation  
231 showed a significant negative correlation. Factors 4 and 5, which were less related to the  
232 CGM-derived indices, showed weaker correlations with %NC. Collectively, we conclude that  
233 glucose dynamics has three components – value, variability, and autocorrelation – and that  
234 these three components are associated with %NC.

235

### 236 **Overview of the three components of dysglycemia: high value, high variability, and low** 237 **autocorrelation**

238 We showed the existence of three components of glucose dynamics: value, variability, and  
239 autocorrelation. We also showed that %NC tended to increase with higher value, higher  
240 variability, and lower autocorrelation. To investigate whether each component can be varied  
241 separately, and to overview the characteristics of glucose dynamics with different values of  
242 the components, we simulated glucose fluctuations using a previously reported mathematical  
243 model<sup>28</sup> (Figs. 4, S8).

244 We could generate glucose fluctuations with almost the same standard deviation  
245 (Std) and AC\_Var but with a different mean (Fig. 4A). Similarly, we could also simulate  
246 glucose fluctuations with almost the same mean and AC\_Var but different Std, and with  
247 almost the same mean and Std but different AC\_Var. These three components could be  
248 changed separately by changing the parameters within the range of values for NGT  
249 individuals (Fig. S8B). Individuals with higher AC\_Var tended to have higher %NC (Fig. 1);  
250 however, comparing the glucose dynamics with higher and lower AC\_Var, the maximum  
251 value of blood glucose was lower in individuals with higher AC\_Var (Fig. 4A).

252 We also investigated the relationship between the three components and shapes of  
253 the glucose response curve after OGTT. Patterns of the glucose response curve after OGTT  
254 were heterogeneous, and four distinct patterns, denoted class 1–4, were previously identified  
255 (Fig. 4B).<sup>29</sup> The classes with a high mean did not necessarily have high Std or AC\_Var (Fig.  
256 4C). The classes with high Std did not necessarily have high mean and AC\_Var (Fig. 4C),  
257 consistent with the result that mean, Std, and AC\_Var had low multicollinearity with each  
258 other. Compared to class 2, only class 1 was lower in mean and Std, and was higher in  
259 AC\_Var. Compared to class 2, only class 3 was higher in mean, Std, and AC\_Var. Compared  
260 to class 2, only class 4 was higher in mean and Std, and lower in AC\_Var. Collectively, the  
261 three components could characterize the previously reported four distinct patterns during  
262 OGTT.

263 Class 3 was characterized by normal FBG and PG120 values, but is reportedly  
264 associated with increased risk of diabetes and higher all-cause mortality rate, suggesting that  
265 subgroups at high risk may not be identified by investigating only FBG and PG120.<sup>29</sup> Std and  
266 AC\_Var were high in class 3 (Fig. 4C), suggesting that high Std and high AC\_Var indicate  
267 glycemic disability independent of PG120.

268

## 269 **DISCUSSION**

270 Here, we showed the existence of three distinct components in glucose dynamics, namely  
271 value, variability, and autocorrelation. We also showed that the higher the value, the higher  
272 the variability; and the lower the autocorrelation, the more vulnerable the coronary plaque.  
273 We previously reported that AC\_Var, an index reflecting autocorrelation, can detect  
274 decreased abilities in glucose regulation independently of other CGM-derived indices  
275 including CGM\_Mean and CGM\_Std, which reflect value and variability components,  
276 respectively.<sup>18</sup> Diabetes diagnosis has been based on elevated FBG, PG120, and HbA1c  
277 levels. However, these indices primarily reflect only the value component of glucose

278 dynamics, and consequently the predictive performance of prediction model for %NC using  
279 FBG, PG120, and HbA1c was relatively modest compared to that of the model using all three  
280 components of glucose dynamics. This result is partially consistent with a previous notion  
281 that glucose dynamics include two components: amplitude and timing.<sup>30</sup> Collectively, for the  
282 effective prediction of glycemic control capacity and diabetic complications, a  
283 comprehensive examination of all three components (value, variability, and autocorrelation)  
284 is imperative.

285 We also showed that CGM-derived indices, especially ADRR and AC\_Var,  
286 contribute to the prediction of %NC by using LASSO (Fig. 2). Given that the definition  
287 equation for ADRR is affected by both high and low concentrations of blood glucose,<sup>17</sup> it is  
288 likely affected by both glucose concentration values and glycemic variability. Factor analysis  
289 (Fig. 3) also showed that ADRR clustered as both factor 1 (value) and factor 2 (variability).  
290 Since three factors, value, variability, and autocorrelation, contribute independently to the  
291 prediction of the complication, it would be useful to examine ADRR, which is influenced by  
292 both value and variability, and AC\_Var, which is influenced by autocorrelation, in  
293 predicting %NC with a minimal number of variables. Therefore, the result of the LASSO  
294 showing that ADRR and AC\_Var are particularly effective in predicting %NC is consistent  
295 with the results of the factor analysis that the three components contribute to the prediction.

296 This study also provided evidence that autocorrelation can vary independently from  
297 the value and variability components by using simulated data. As shown in Figure 4, these  
298 three components could be varied independently by simply changing the parameters related  
299 to glucose regulation within the range of NGT individuals. In addition, simulated glucose  
300 dynamics indicated that even subjects with low autocorrelation did not necessarily have high  
301 maximum and minimum blood glucose levels. This study also indicated that these three  
302 components qualitatively corresponded to the four distinct glucose patterns observed after  
303 glucose administration, which were identified in a previous study.<sup>29</sup> Glycemic variability is

304 involved in T2DM complications by oxidative stress and endothelial dysfunction;<sup>6,31</sup>  
305 however, the reasons why the three components, especially autocorrelation, independently  
306 contribute to the prediction remain unknown. The underlying biological mechanisms and  
307 effects of the three components on living systems need to be investigated in future studies.

308         The current study had several limitations. LASSO and factor analysis indicated that  
309 CGM-related features were particularly important in predicting %NC. However, these results  
310 do not mean that other clinical parameters do not associate with T2DM complications,  
311 because we only included subjects with well-controlled serum cholesterol and BP levels in  
312 this study. Moreover, a previous study indicated that components of interday variability and  
313 hypoglycemia exist under CGM-derived indices,<sup>25</sup> but we did not observe these components.  
314 This may be because the number of T2DM subjects was small and the measurement period  
315 was short (2 days) in this study. Factor analyses of data with a longer measurement period  
316 that include more patients with T1DM and T2DM could change the results. In addition,  
317 although we used three different data sets with a total of 174 subjects, the sample size still  
318 tended to be small to examine the relationship among the variables examined in this study.  
319 Larger and prospective studies are required for a more accurate assessment of the variables in  
320 the prediction of the abnormality.

321         In conclusion, glucose dynamics has three components: value, variability, and  
322 autocorrelation. These three components are associated with coronary plaque vulnerability.  
323 CGM-derived indices reflecting these three components can be valuable predictive tools for  
324 T2DM complications, compared to conventional diabetes diagnostic markers reflecting only  
325 the value component. To facilitate this CGM-derived prediction, we created a web  
326 application that performs a multiple regression model with these three components as input  
327 variables (<https://cgm-basedregression.streamlit.app/>).

328

## 329 **METHODS**

### 330 **Subjects and measurements**

331 A previously reported dataset<sup>15</sup> was used in this study. The retrospective observational study  
332 was approved by the ethics committee of Kobe University Graduate School of Medicine  
333 (UMIN000018326; Kobe, Japan). Briefly, a 75-g OGTT, CGM, and percutaneous coronary  
334 intervention (PCI) were carried out on 53 participants. Of note, with a type I error of 0.05, a  
335 power of 0.8, and an expected correlation coefficient of 0.4, a sample size of 47 was required  
336 to detect a significant difference from zero in the correlation coefficient. The iPro2 CGM  
337 system (Medtronic, Northridge, CA, USA) was used, and data from the second and third days  
338 of CGM were analyzed. During PCI, VH-IVUS was carried out to assess the plaque  
339 components.

340 Participants aged 20–80 years with LDL-C levels < 120 mg/dL under statin  
341 administration or <100 mg/dL under other treatments for dyslipidemia, including lifestyle  
342 intervention, were included in this study. Participants with acute coronary syndrome,  
343 unsuitable anatomy for virtual VH-IVUS, poor imaging by VH-IVUS, hemodialysis,  
344 inflammatory disease, shock, low cardiac output, or concurrent malignant disease were  
345 excluded from this study.

346

### 347 **Calculation of clinical indices**

348 CGM-derived indices:

349 Fourteen CGM-derived indices were evaluated: 12 relatively well-known CGM-derived  
350 indices<sup>17</sup> and 2 indices (AC\_Mean and AC\_Var), which were indicated to capture glucose  
351 handling capacities independently of the 12 indices.<sup>18</sup> AC\_Mean and AC\_Var are the mean  
352 and variance of the autocorrelation coefficients at lags 1–30, respectively. CGM\_Mean and  
353 CGM\_Std indicate the mean value and Std of glucose levels measured by CGM, respectively.  
354 CONGA, LI, JINDEX, HBGI, GRADE, MODD, MAGE, ADRR, MVALUE, and MAG

355 were calculated using EasyGV software.<sup>17</sup> The calculating formulae of these indices are  
356 shown in Table S1. They were calculated from the CGM data measured every 5 min.

357

358 OGTT-derived indices:

359 Three OGTT-derived indices were calculated as previously described.<sup>15</sup> I.I. indicates insulin  
360 secretion, which can be calculated from the ratio of the increment of immunoreactive insulin  
361 (IRI) to that of plasma glucose at 30 min after onset of the OGTT. Composite index indicates  
362 insulin sensitivity, which can be calculated from fasting plasma glucose, fasting IRI, mean  
363 blood glucose levels, and mean serum IRI concentrations during the OGTT. Oral DI was  
364 calculated from the product of composite index and the ratio of the area under the insulin  
365 concentration curve from 0 to 120 min to that for plasma glucose from 0 to 120 min, without  
366 using the data measured at 90 min, in the OGTT.

367

368 VH-IVUS-derived index:

369 VH-IVUS was carried out using the Eagle Eye Platinum 3.5-Fr 20-MHz catheter (Volcano,  
370 Rancho Cordova, CA, USA), as previously described.<sup>15</sup> The %NC, a widely used parameter  
371 of plaque vulnerability, was evaluated.

372

### 373 **Prediction models and statistical analyses**

374 In this study, we conducted multiple linear regression, LASSO regression, and PLS  
375 regression. The input variables in these models included the following 26 variables: BMI,  
376 SBP, DBP, TGs, LDL-C, HDL-C, FBG, HbA1c, PG120, I.I., composite index, oral DI,  
377 CGM\_Mean, CGM\_Std, CONGA, LI, JINDEX, HBGI, GRADE, MODD, MAGE, ADRR,  
378 MVALUE, MAG, AC\_Mean, and AC\_Var. In conducting these models, z-score  
379 normalization on each input variable was performed.

380 The predictive performance of multiple linear regression was evaluated by the  
381 coefficient of determination ( $R^2$ ), the adjusted coefficient of determination ( $Adj R^2$ ), and AIC.  
382 The multicollinearity of the input variables was estimated by VIF. LASSO regression is a  
383 kind of linear regression with L1 regularization.<sup>20</sup> The optimal regularization coefficient,  
384 lambda, was based on leave-one-out cross-validation and mean-squared error. The  
385 importance of the input variables in predicting %NC was evaluated by the VIP scores<sup>22</sup> that  
386 were generated from PLS regression. These models were conducted using scikit-learn, a  
387 python-based tool kit.

388 Relationships among indices were also evaluated using Spearman's correlation  
389 coefficients ( $r$ ), and the correlation coefficients were reported with 95% CIs through  
390 bootstrap resampling. The number of resamples performed to form the distribution was set at  
391 10000. Benjamini–Hochberg's multiple comparison test was also performed with a  
392 significance threshold of  $Q < 0.05$ .

393

#### 394 **Factor analysis and hierarchical clustering analysis**

395 The intercorrelations of the clinical parameters and their associations with %NC were  
396 assessed using exploratory factor analyses and hierarchical clustering analyses. We followed  
397 the previously reported approach<sup>23,24,26,32</sup> with some modifications in conducting our  
398 exploratory factor analyses. BIC and MAP methods were used to determine the number of  
399 underlying factors. Variables with factor loadings of  $\geq 0.30$  were used in interpretation. To  
400 improve the interpretation, orthogonal (varimax) rotation was used. To evaluate the  
401 applicability of the factor analysis, KMO and Bartlett's spherical test were performed. To  
402 evaluate internal consistency of each factor, Cronbach's  $\alpha$  and item–total correlations were  
403 calculated. The association of the factor scores with %NC was assessed using Spearman's  
404 correlation.



405 Hierarchical clustering analysis was conducted using a method that combines a  
406 Euclidean distance measure and Ward linkage. It was adopted after Z score normalization.  
407 I.I., composite index, oral DI, and AC\_Mean were inverted negatively so that the value of  
408 indices increased in subjects with abnormalities. The quality of the hierarchical clustering  
409 analysis was evaluated based on silhouette analysis.<sup>33</sup>

410

### 411 **Mathematical model used for simulating the characteristics of glucose dynamics**

412 In simulating the characteristics of glucose dynamics, we used a simple and stable model,<sup>28</sup>  
413 which can be written as follows:

$$414 \quad \frac{dG}{dt} = -k_{\text{glu}}G - k_{\text{sen}}IG + k_{\text{pro}} + f$$

$$415 \quad \frac{dI}{dt} = \frac{k_{\text{sec}}}{k_{\text{tim}}} \int_{t-k_{\text{tim}}}^t G ds - k_{\text{cle}}I$$

416 where the variables  $G$  and  $I$  denote blood glucose and insulin concentrations, respectively.

417 We simulated 240 min profiles of  $G$ , and calculated the mean, Std, and AC\_Var of  $G$ . The  
418 parameters were changed within the range participants could take.<sup>28</sup> Five mg/dL/min glucose  
419 was applied for 10 min at 30 min as the external input of glucose  $f$  (Fig. S8A).

420

### 421 **Characterization of glucose patterns during the OGTT**

422 We investigated the characteristics of previously reported glucose patterns during the  
423 OGTT.<sup>29</sup> In the study, 5861 subjects without diabetes underwent the OGTT with  
424 measurements of glucose levels at three time points (0, 30, and 120 min), and four distinct  
425 glucose patterns associated with long-term outcomes including diabetes onset, CVD, and all-  
426 cause mortality rate were identified. For the calculation of mean, Std, and AC\_Var of glucose  
427 levels, each time point was linearly imputed. Here, AC\_Var was calculated from the  
428 autocorrelation function at lags 1–20, as we had glucose data available for only 2 h after the  
429 OGTT.

430

## 431 **RESOURCE AVAILABILITY**

### 432 **Lead contact**

433 For any additional information and requests regarding resources and reagents, please contact  
434 the lead contact, Shinya Kuroda ([skuroda@bs.s.u-tokyo.ac.jp](mailto:skuroda@bs.s.u-tokyo.ac.jp)).

### 435 **Data and code availability**

436 The CGM data that support the findings of this study are available from the GitHub  
437 repository ([https://github.com/HikaruSugimoto/CGM\\_regression\\_app](https://github.com/HikaruSugimoto/CGM_regression_app)). The code that  
438 calculates AC\_Mean and AC\_Var and that performs regression analysis with CGM-derived  
439 indices as input variables are available from the repository  
440 ([https://github.com/HikaruSugimoto/CGM\\_regression\\_app](https://github.com/HikaruSugimoto/CGM_regression_app)) and the web application  
441 (<https://cgm-basedregression.streamlit.app/>).

### 442 **Materials availability**

443 The study did not generate any new material.

### 444 **Acknowledgments**

445 **Personal Thanks.** We thank our laboratory members for critically reading this manuscript

446 **Author Contributions.** H.S. analyzed the data. H.S., K.H., T.Y., N.O.S., Y.H., H.O., K.H.,  
447 K.S., W.O., and S.K. wrote the manuscript. W.O. and S.K. supervised the study.

448 **Conflict of Interest.** The authors have no conflicts of interest to declare.

449 **Funding and Assistance.** This study was supported by the Japan Society for the Promotion  
450 of Science (JSPS) KAKENHI (JP21H04759), CREST, the Japan Science and Technology  
451 Agency (JST) (JPMJCR2123), and The Uehara Memorial Foundation.

452

453 **Figures**

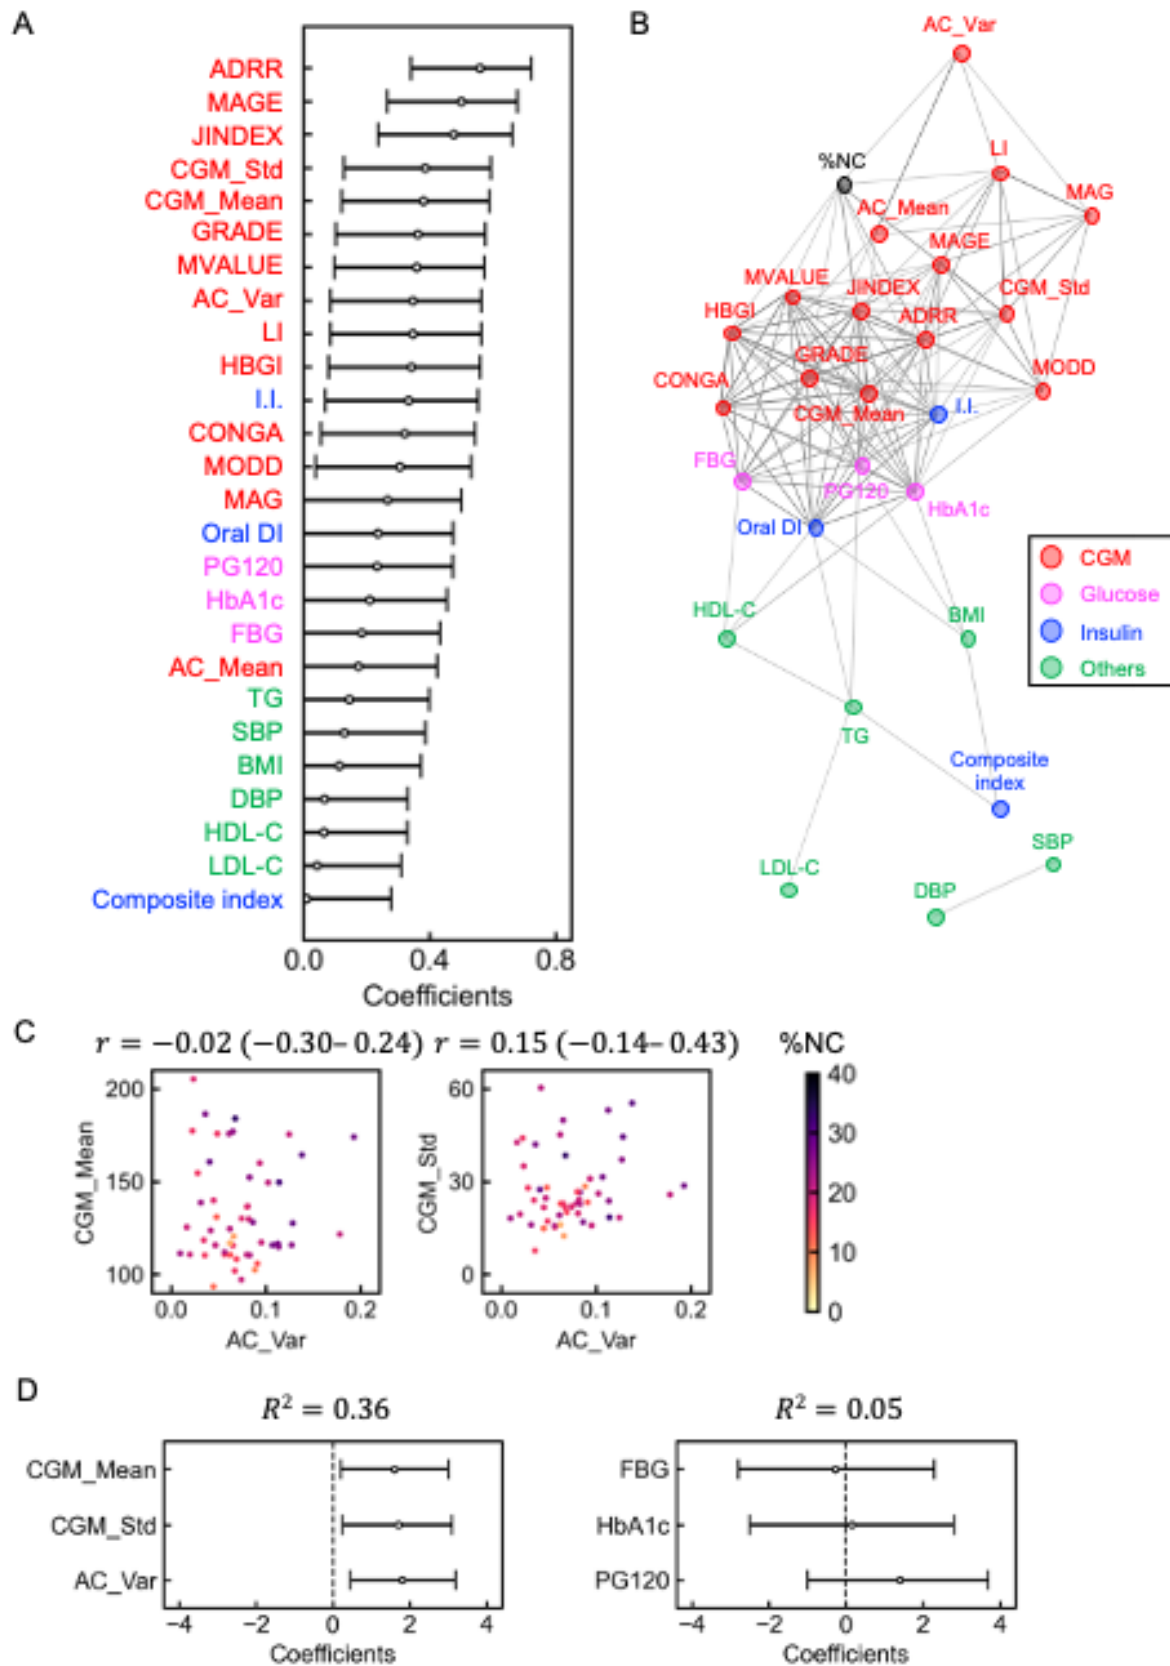

454

455 **Figure 1. Relationship among clinical parameters.**

456 (A) The absolute values of Spearman's correlation coefficients between clinical parameters  
457 and %NC. Bars represent the 95% CIs.

458 (B) A spring layout of the correlation network involving %NC (black), 14 CGM-derived  
459 indices (red), 3 blood glucose level-related indices (magenta), 3 insulin sensitivity or  
460 secretion-related indices (blue), and 6 other clinical indices (green) obtained from a single  
461 blood test or physical measurement. Connections denote relationships with  $Q < 0.05$ . The  
462 width of the edges is proportional to the corresponding correlation coefficient.

463 (C) Scatter plots for AC\_Var versus CGM\_Mean (the left), and AC\_Var versus CGM\_Std  
464 (the right). Each point corresponds to the values for a single subject. Subjects were colored  
465 based on the value of %NC.  $r$  is Spearman's correlation coefficient, and the value in  
466 parentheses is 95% CI.

467 (D) Multiple regression analysis between %NC and CGM\_Mean, CGM\_Std, and AC\_Var  
468 (the left). That between %NC and FBG, HbA1c, and PG120 (the right). Bars represent the  
469 95% CIs of the coefficients.

470

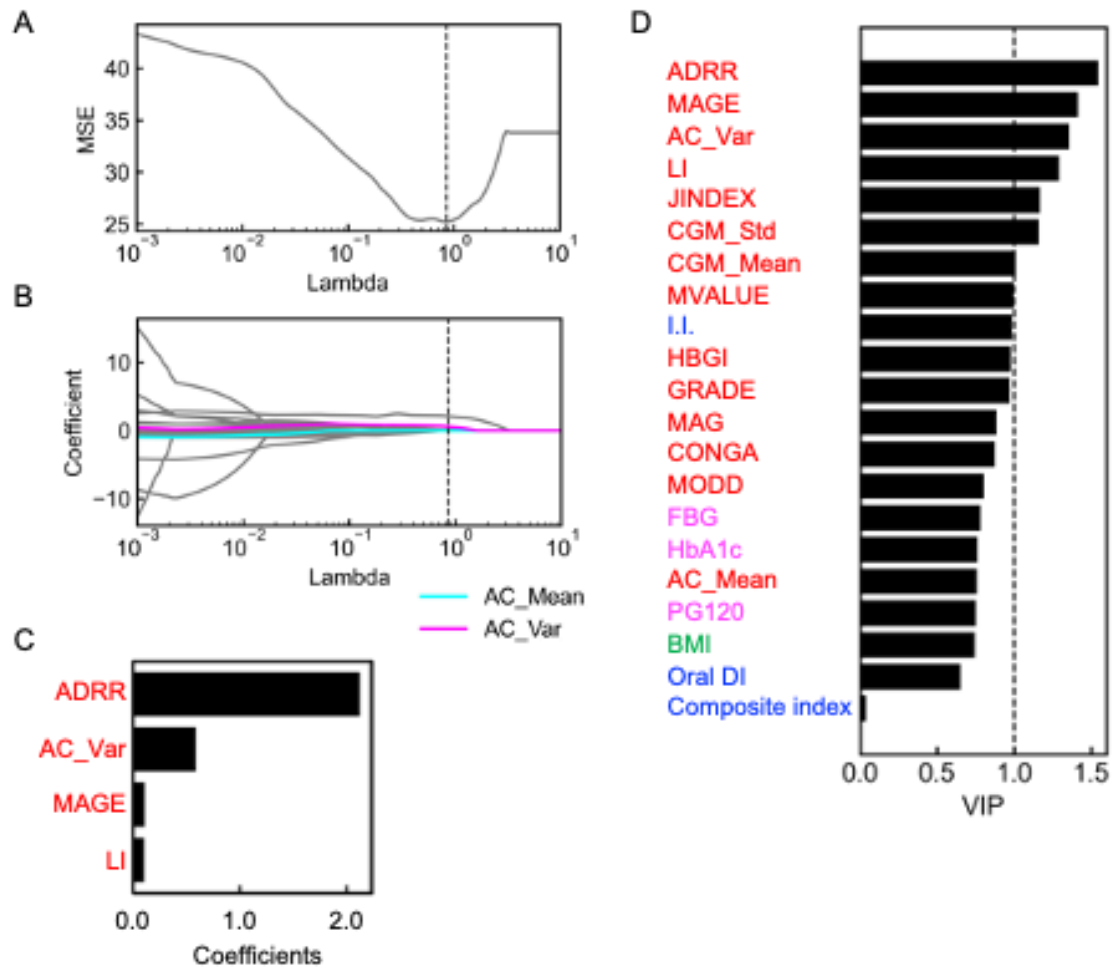

471

472 **Figure 2. LASSO and PLS regression analyses for predicting %NC.**

473 (A) Relationship between regularization coefficients ( $\lambda$ ) and the MSE based on the  
 474 leave-one-out cross-validation in predicting %NC. Dotted vertical line indicates the optimal  
 475  $\lambda$ , which provides the least MSE. The optimal  $\lambda$  was 0.849.

476 (B) LASSO regularization paths along the  $\lambda$  in predicting %NC. Cyan, magenta, and  
 477 gray lines indicate the estimated coefficients of AC\_Mean, AC\_Var, and the other input  
 478 variables, respectively. Dotted vertical line indicates the optimal  $\lambda$ .

479 (C) Estimated coefficients with the optimal  $\lambda$ . Only variables with non-zero coefficients  
 480 are shown. Input variables include the following 21 variables: BMI, FBG, HbA1c, PG120,  
 481 I.I., composite index, oral DI, CGM\_Mean, CGM\_Std, CONGA, LI, JINDEX, HBGI,  
 482 GRADE, MODD, MAGE, ADRR, MVALUE, MAG, AC\_Mean, and AC\_Var.

483 (D) VIP generated from the PLS regression predicting %NC. Variables with a  $VIP \geq 1$  (the  
484 dotted line) were considered to significantly contribute to the prediction.  
485

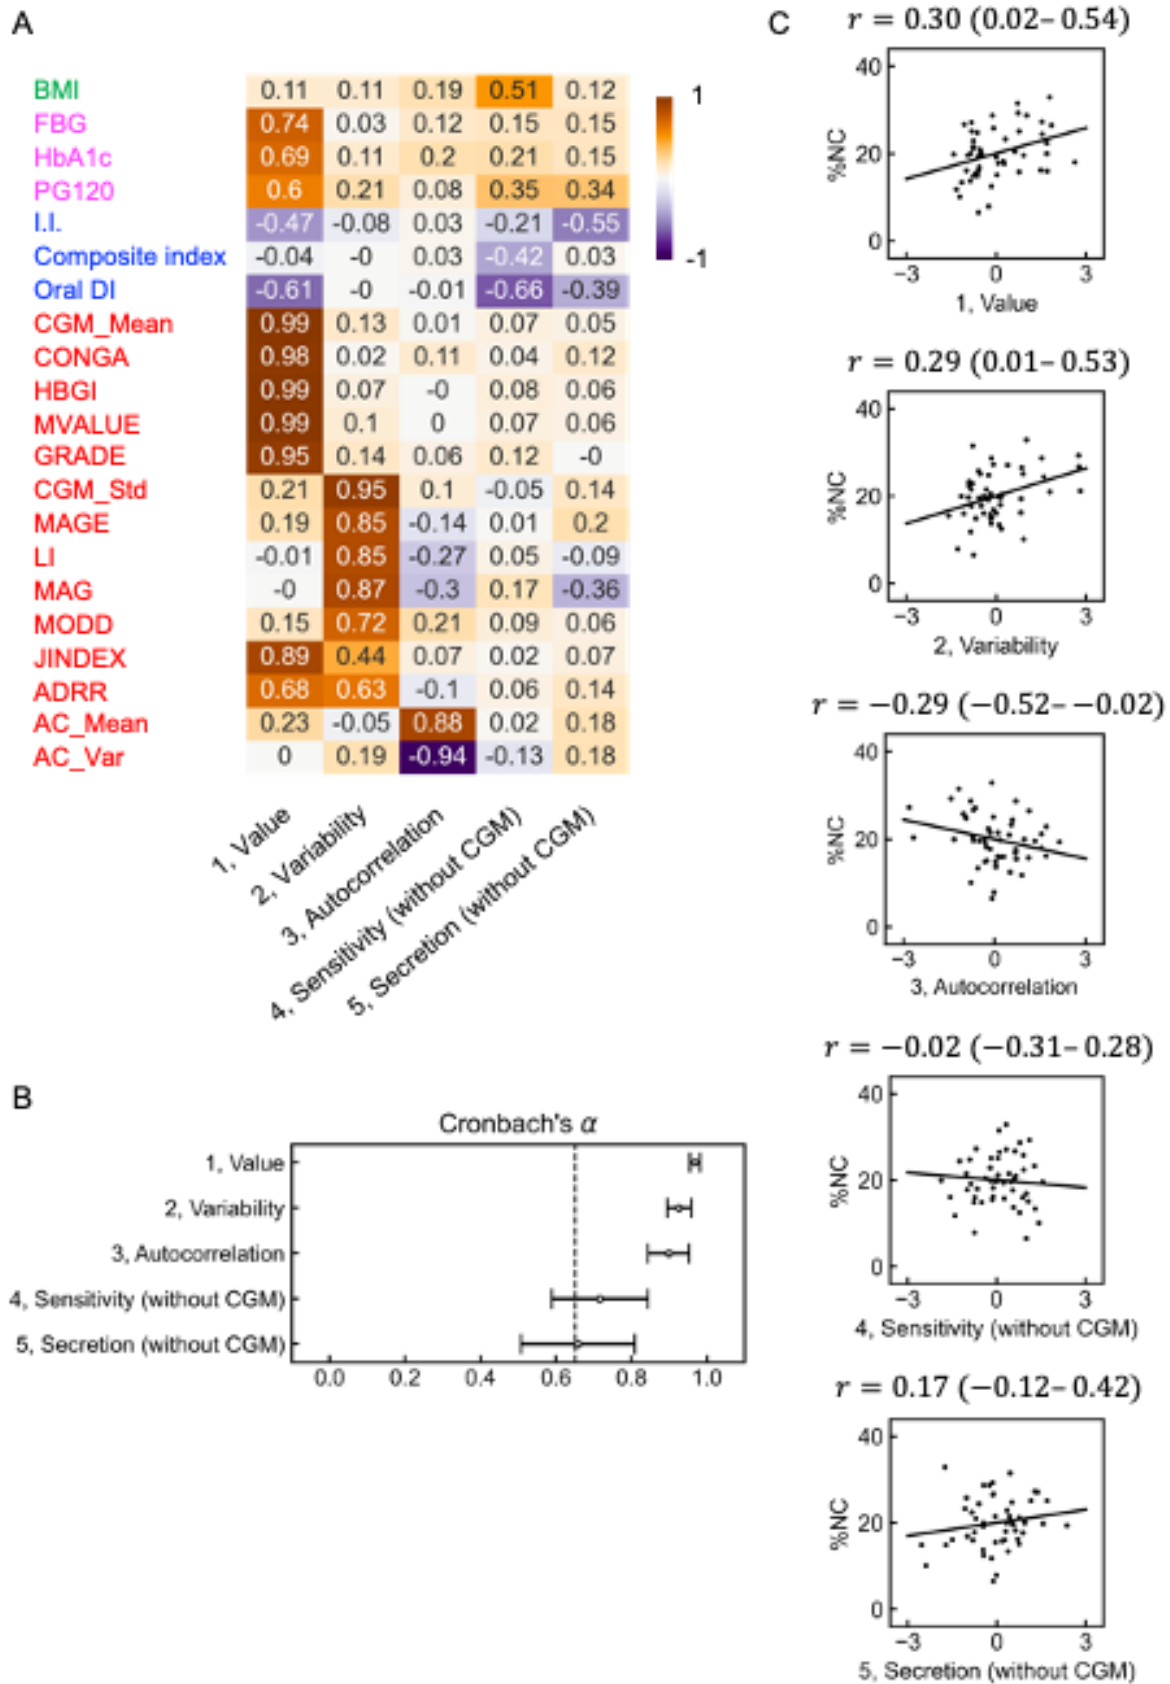

486

487 **Figure 3. Factor analysis of the clinical parameters.**

488 (A) Factor analysis after orthogonal rotation. The values and colors were based on the factor  
489 loadings. The columns represent each factor. The rows represent input indices.

490 (B) Cronbach's  $\alpha$  for each factor. Bars represent the 95% CI.

491 (C) Scatter plots and fitted linear regression lines for factor scores versus %NC. Each point  
492 corresponds to the values for a single subject.  $r$  is Spearman's correlation coefficient, and the  
493 value in parentheses is the 95% CI.

494



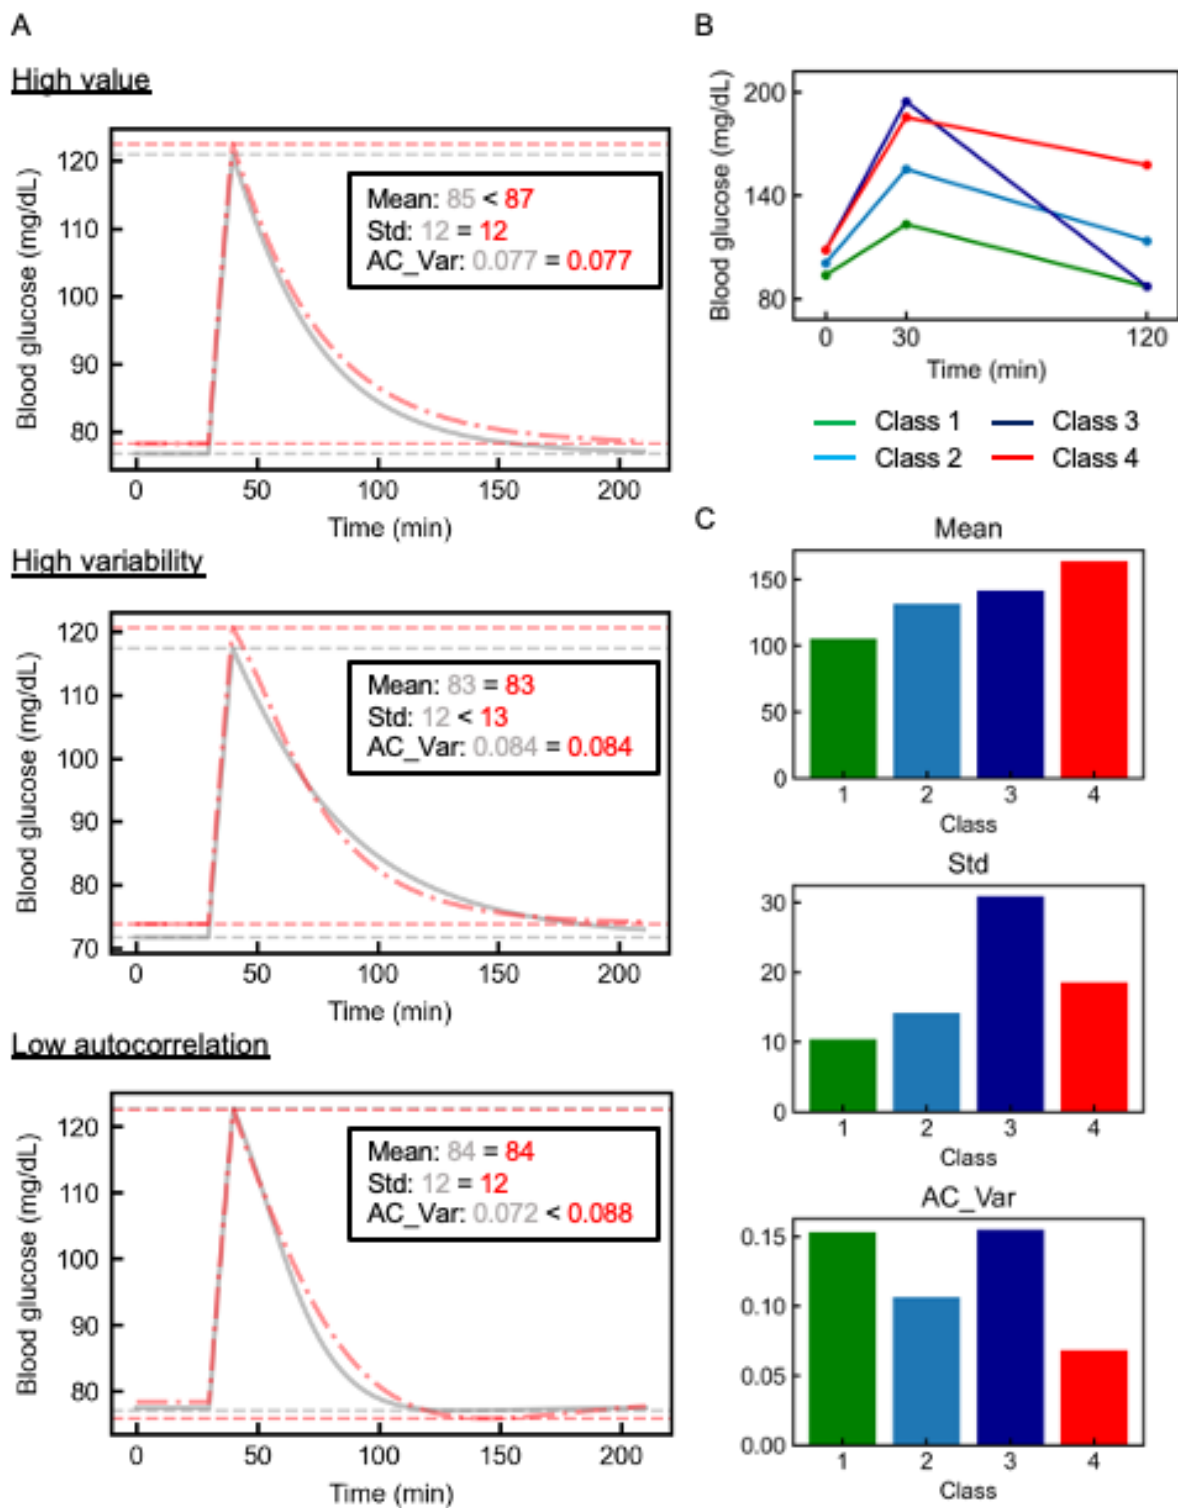

495

496 **Figure 4. Overview of the three components of glucose dynamics.**

497 (A) 240 min simulated glucose concentration. The colors of the line are based on the mean

498 value (Mean), Std, and AC\_Var of the simulated blood glucose. Red and gray dotted

499 horizontal lines indicate the minimum or maximum values of blood glucose, respectively.

500 (B) Previously reported patterns of blood glucose during the OGTT.<sup>29</sup> Green, class 1; light  
501 blue, class 2; dark blue, class 3; red, class 4.

502 (C) Mean, Std, and AC\_Var of the glucose during the OGTT. Colors are based on the class  
503 shown in Figure 4B.

504

505

## 506 **References**

- 507 1. Fiarni, C., Sipayung, E. M. & Maemunah, S. Analysis and Prediction of Diabetes  
508 Complication Disease using Data Mining Algorithm. *Procedia Comput. Sci.* **161**, 449–  
509 457 (2019).
- 510 2. Bax, J. J. *et al.* Screening for coronary artery disease in patients with diabetes. *Diabetes*  
511 *Care* **30**, 2729–2736 (2007).
- 512 3. Ravaut, M. *et al.* Predicting adverse outcomes due to diabetes complications with  
513 machine learning using administrative health data. *NPJ Digit Med* **4**, 24 (2021).
- 514 4. Young, L. H. *et al.* Cardiac outcomes after screening for asymptomatic coronary artery  
515 disease in patients with type 2 diabetes: the DIAD study: a randomized controlled trial.  
516 *JAMA* **301**, 1547–1555 (2009).
- 517 5. Psoma, O., Makris, M., Tselepis, A. & Tsimihodimos, V. Short-term Glycemic  
518 Variability and Its Association With Macrovascular and Microvascular Complications in  
519 Patients With Diabetes. *J. Diabetes Sci. Technol.* 19322968221146810 (2022).
- 520 6. Monnier, L., Colette, C. & Owens, D. R. Glycemic variability: the third component of  
521 the dysglycemia in diabetes. Is it important? How to measure it? *J. Diabetes Sci.*  
522 *Technol.* **2**, 1094–1100 (2008).
- 523 7. Selvin, E. *et al.* Glycated hemoglobin, diabetes, and cardiovascular risk in nondiabetic  
524 adults. *N. Engl. J. Med.* **362**, 800–811 (2010).
- 525 8. Gorst, C. *et al.* Long-term Glycemic Variability and Risk of Adverse Outcomes: A  
526 Systematic Review and Meta-analysis. *Diabetes Care* **38**, 2354–2369 (2015).
- 527 9. Zhou, J. J., Schwenke, D. C., Bahn, G., Reaven, P. & VADT Investigators. Glycemic  
528 Variation and Cardiovascular Risk in the Veterans Affairs Diabetes Trial. *Diabetes Care*  
529 **41**, 2187–2194 (2018).
- 530 10. Gerbaud, E. *et al.* Glycemic Variability Is a Powerful Independent Predictive Factor of  
531 Midterm Major Adverse Cardiac Events in Patients With Diabetes With Acute Coronary  
532 Syndrome. *Diabetes Care* **42**, 674–681 (2019).
- 533 11. Su, G. *et al.* Association of glycemic variability and the presence and severity of  
534 coronary artery disease in patients with type 2 diabetes. *Cardiovasc. Diabetol.* **10**, 19  
535 (2011).
- 536 12. Cai, J. *et al.* Impact of the complexity of glucose time series on all-cause mortality in  
537 patients with type 2 diabetes. *J. Clin. Endocrinol. Metab.* **108**, 1093–1100 (2023).
- 538 13. Service, F. J. Glucose variability. *Diabetes* **62**, 1398–1404 (2013).
- 539 14. Tang, X. *et al.* Glycemic variability evaluated by continuous glucose monitoring system  
540 is associated with the 10-y cardiovascular risk of diabetic patients with well-controlled  
541 HbA1c. *Clin. Chim. Acta* **461**, 146–150 (2016).

- 542 15. Otowa-Suematsu, N. *et al.* Comparison of the relationship between multiple parameters  
543 of glycemic variability and coronary plaque vulnerability assessed by virtual histology-  
544 intravascular ultrasound. *J. Diabetes Investig.* **9**, 610–615 (2018).
- 545 16. Okada, K. *et al.* Association between blood glucose variability and coronary plaque  
546 instability in patients with acute coronary syndromes. *Cardiovasc. Diabetol.* **14**, 111  
547 (2015).
- 548 17. Hill, N. R. *et al.* Normal reference range for mean tissue glucose and glycemic  
549 variability derived from continuous glucose monitoring for subjects without diabetes in  
550 different ethnic groups. *Diabetes Technol. Ther.* **13**, 921–928 (2011).
- 551 18. Sugimoto, H. *et al.* Improved Detection of Decreased Glucose Handling Capacities via  
552 Novel Continuous Glucose Monitoring-Derived Indices: AC\_Mean and AC\_Var.  
553 *medRxiv 2023–2009* (2023).
- 554 19. Utzschneider, K. M. *et al.* Oral disposition index predicts the development of future  
555 diabetes above and beyond fasting and 2-h glucose levels. *Diabetes Care* **32**, 335–341  
556 (2009).
- 557 20. Tibshirani, R. Regression shrinkage and selection via the lasso. *J. R. Stat. Soc.* **58**, 267–  
558 288 (1996).
- 559 21. Wei, H. *et al.* Environmental chemical exposure dynamics and machine learning-based  
560 prediction of diabetes mellitus. *Sci. Total Environ.* **806**, 150674 (2022).
- 561 22. Wold, S., Sjöström, M. & Eriksson, L. PLS-regression: a basic tool of chemometrics.  
562 *Chemometrics Intellig. Lab. Syst.* **58**, 109–130 (2001).
- 563 23. Cappelleri, J. C., Gerber, R. A., Kourides, I. A. & Gelfand, R. A. Development and  
564 factor analysis of a questionnaire to measure patient satisfaction with injected and  
565 inhaled insulin for type 1 diabetes. *Diabetes Care* **23**, 1799–1803 (2000).
- 566 24. Oh, J.-Y., Hong, Y. S., Sung, Y.-A. & Barrett-Connor, E. Prevalence and factor analysis  
567 of metabolic syndrome in an urban Korean population. *Diabetes Care* **27**, 2027–2032  
568 (2004).
- 569 25. Augstein, P. *et al.* Q-Score: development of a new metric for continuous glucose  
570 monitoring that enables stratification of antihyperglycaemic therapies. *BMC Endocr.*  
571 *Disord.* **15**, 22 (2015).
- 572 26. Guo, W., Zhou, Q., Jia, Y. & Xu, J. Cluster and Factor Analysis of Elements in Serum  
573 and Urine of Diabetic Patients with Peripheral Neuropathy and Healthy People. *Biol.*  
574 *Trace Elem. Res.* **194**, 48–57 (2020).
- 575 27. Hall, H. *et al.* Glucotypes reveal new patterns of glucose dysregulation. *PLoS Biol.* **16**,  
576 e2005143 (2018).
- 577 28. De Gaetano, A. & Arino, O. Mathematical modelling of the intravenous glucose  
578 tolerance test. *J. Math. Biol.* **40**, 136–168 (2000).

- 579 29. Hulman, A. *et al.* Glucose patterns during an oral glucose tolerance test and associations  
580 with future diabetes, cardiovascular disease and all-cause mortality rate. *Diabetologia*  
581 **61**, 101–107 (2018).
- 582 30. Cobelli, C. & Facchinetti, A. Yet Another Glucose Variability Index: Time for a  
583 Paradigm Change? *Diabetes Technol. Ther.* **20**, 1–3 (2018).
- 584 31. Ceriello, A. *et al.* Oscillating glucose is more deleterious to endothelial function and  
585 oxidative stress than mean glucose in normal and type 2 diabetic patients. *Diabetes* **57**,  
586 1349–1354 (2008).
- 587 32. Lakka, H.-M. *et al.* The metabolic syndrome and total and cardiovascular disease  
588 mortality in middle-aged men. *JAMA* **288**, 2709–2716 (2002).
- 589 33. Rousseeuw, P. J. Silhouettes: A graphical aid to the interpretation and validation of  
590 cluster analysis. *J. Comput. Appl. Math.* **20**, 53–65 (1987).
