1 **Three components of glucose dynamics – value, variability, and**  
2 **autocorrelation – are independently associated with coronary plaque**  
3 **vulnerability**

4  
5 **Authors**

6 Hikaru Sugimoto,<sup>1</sup> Ken-ichi Hironaka,<sup>2</sup> Tomoko Yamada,<sup>3</sup> Natsu Otowa-Suematsu,<sup>3</sup> Yushi  
7 Hirota,<sup>3</sup> Hiromasa Otake,<sup>4</sup> Ken-Ichi Hirata,<sup>3</sup> Kazuhiko Sakaguchi,<sup>3</sup> Wataru Ogawa,<sup>3\*</sup> and  
8 Shinya Kuroda<sup>1,2,5\*</sup>

9  
10 **Affiliations**

11 <sup>1</sup>Department of Biochemistry and Molecular Biology, Graduate School of Medicine, The  
12 University of Tokyo, 7-3-1 Hongo, Bunkyo-ku, Tokyo 113-0033, Japan

13 <sup>2</sup>Department of Biological Sciences, Graduate School of Science, The University of Tokyo,  
14 7-3-1 Hongo, Bunkyo-ku, Tokyo 113-0033, Japan

15 <sup>3</sup>Division of Diabetes and Endocrinology, Department of Internal Medicine, Kobe University  
16 Graduate School of Medicine, Kusunoki-cho 7-5-1, Chuo-ku, Kobe, Hyogo 650-0017, Japan

17 <sup>4</sup>Division of Cardiovascular Medicine, Department of Internal Medicine, Kobe University  
18 Graduate School of Medicine, Kusunoki-cho 7-5-1, Chuo-ku, Kobe, Hyogo 650-0017, Japan

19 <sup>5</sup>Lead contact

20  
21 \*Corresponding authors: Wataru Ogawa, [ogawa@med.kobe-u.ac.jp](mailto:ogawa@med.kobe-u.ac.jp); Shinya Kuroda,

22 [skuroda@bs.s.u-tokyo.ac.jp](mailto:skuroda@bs.s.u-tokyo.ac.jp)

23

24 **ABSTRACT**

25 Impaired glucose homeostasis leads to numerous complications, with coronary artery disease  
26 (CAD) being a major contributor to healthcare costs worldwide. Given the limited efficacy of  
27 current CAD screening methods, we investigated the association between glucose dynamics  
28 and a predictor of coronary events measured by virtual histology-intravascular ultrasound  
29 (%NC), with the aim of predicting CAD using easy-to-measure indices. We found that  
30 continuous glucose monitoring (CGM)-derived indices, particularly average daily risk ratio  
31 (ADRR) and AC\_Var, exhibited stronger predictive capabilities for %NC compared to  
32 commonly used indices such as fasting blood glucose (FBG), hemoglobin A1C (HbA1c), and  
33 plasma glucose level at 120 min during oral glucose tolerance tests (PG120). Factor analysis  
34 identified three distinct components underlying glucose dynamics – value, variability, and  
35 autocorrelation – each independently associated with %NC. ADRR was influenced by the  
36 first two components and AC\_Var by the third. FBG, HbA1c, and PG120 were influenced  
37 only by the value component, making them insufficient for %NC prediction. Our results were  
38 validated using data sets from Japan (n=64), America (n=53), and China (n=100).  
39 CGM-derived indices reflecting the three components of glucose dynamics can serve as more  
40 effective screening tools for CAD risk assessment, complementing or possibly replacing  
41 traditional diabetes diagnostic methods.

## 42 INTRODUCTION

43 Diabetes mellitus (DM) is a metabolic disorder affecting more than 400 million people  
44 worldwide. Among its complications, coronary artery disease (CAD) accounts for a  
45 significant proportion of morbidity, mortality and healthcare costs in patients with type 2 DM  
46 (T2DM) (Bax et al., 2007). Various prognostic models (Fiarni et al., 2019; Ravaut et al.,  
47 2021) and diagnostic markers (Bax et al., 2007) have been developed to predict CAD;  
48 however, screening of CAD can be ineffective, costly, or laborious (Bax et al., 2007; Young  
49 et al., 2009). More effective approaches for identifying individuals at high risk for  
50 complications using readily available clinical variables are warranted.

51 Blood glucose levels are among the readily obtained predictors of the complications  
52 (Psoma et al., 2022). The disrupted conditions of glucose dynamics seen in impaired glucose  
53 tolerance (IGT) and T2DM are partly characterized by high concentrations of blood glucose  
54 levels (Monnier et al., 2008). High concentrations of blood glucose levels have been defined  
55 as having high hemoglobin A1c (HbA1c) levels, fasting blood glucose (FBG) levels, and  
56 plasma glucose concentration at 120 min during the oral glucose tolerance test (OGTT)  
57 (PG120) (Monnier et al., 2008). These indices, especially HbA1c, are associated with  
58 complications of T2DM (Selvin et al., 2010).

59 Recent studies have shown that glucose variability, in addition to absolute glucose  
60 concentration, significantly contributes to the prognosis of complications (Gerbaud et al.,  
61 2019; Gorst et al., 2015; Monnier et al., 2008; Psoma et al., 2022; Su et al., 2011; Zhou et al.,  
62 2018) and all-cause mortality (Cai et al., 2022). Continuous glucose monitoring (CGM) can  
63 estimate short-term glycemc variability (Service, 2013), and has been reported to predict  
64 T2DM complications (Tang et al., 2016). Standard deviation (Std) of glucose levels  
65 (CGM\_Std), mean amplitude of glycemic excursion (MAGE), mean of daily difference  
66 (MODD), and continuous overlapping net glycemc action (CONGA) are established indices  
67 of glycemc variability, of which CGM\_Std and MAGE are more highly correlated with

68 coronary plaque properties (Otowa-Suematsu et al., 2018). Among glucose level-related  
69 indices, including HbA1c and FBG, MAGE is an independent determinant of coronary  
70 plaque instability (Okada et al., 2015).

71 Other CGM-derived indices such as average daily risk ratio (ADRR), lability index  
72 (LI), J-index, mean absolute glucose (MAG), and glycemic risk assessment in diabetes  
73 equation (GRADE) have also been developed (Hill et al., 2011). We recently showed that  
74 AC\_Mean and AC\_Var, which are calculated from the autocorrelation function of glucose  
75 levels measured by CGM, can detect decreased abilities in glucose regulation that cannot be  
76 captured by FBG, HbA1c, or the other conventional CGM-derived indices (Sugimoto et al.,  
77 2023). The characteristics of glucose dynamics can also be estimated from insulin  
78 concentrations. The disposition index (DI), which is the product of insulin sensitivity and  
79 insulin secretion, reflects and predicts glycemic disability beyond FBG (Utzschneider et al.,  
80 2009). Several other glucose-related indices and the relationship between the indices have  
81 also been reported (Fabris et al., 2015, 2014; Keshet et al., 2023). Despite these advances, a  
82 comprehensive understanding of how these various indices can be optimally combined to  
83 predict T2DM complications, particularly CAD, remains elusive. Furthermore, the  
84 underlying factors that these indices represent and their individual associations with CAD  
85 remain to be fully elucidated.

86 This study aims to address these knowledge gaps through three objectives: (i) to  
87 determine which clinical parameters are effective predictors of coronary plaque vulnerability;  
88 (ii) to identify the factors underlying these indices; and (iii) to elucidate how these factors are  
89 associated with coronary plaque vulnerability. We investigated the characteristics of 14  
90 CGM-derived indices: 12 relatively well-known CGM-derived indices (Hill et al., 2011) and  
91 2 indices (AC\_Mean and AC\_Var) as well as OGTT-derived indices, and investigated the  
92 relationship between these parameters and coronary plaque vulnerability assessed by virtual  
93 histology-intravascular ultrasound (VH-IVAS). We showed that three factors, namely, value,

94 variability, and autocorrelation, underly blood glucose level-related indices, and that the three  
95 are independently associated with coronary plaque vulnerability.

96

## 97 **RESULTS**

### 98 **Mean, standard deviation, and autocorrelation function of glucose levels independently** 99 **contribute to the prediction of coronary plaque vulnerability**

100 We previously reported that AC\_Var, calculated from the autocorrelation function of glucose  
101 levels, can capture decreased glucose handling capacities that cannot be captured by the mean  
102 (CGM\_Mean) and standard deviation (CGM\_Std) of glucose levels measured by CGM  
103 (Sugimoto et al., 2023). Based on the study, we hypothesized that AC\_Var could identify  
104 individuals with high %NC, a widely used parameter of plaque vulnerability, independently  
105 from CGM\_Mean and CGM\_Std. To test this hypothesis, we conducted multiple regression  
106 analysis with CGM\_Mean, CGM\_Std, and AC\_Var as input variables and %NC as the  
107 objective variable (Fig. 1A). For comparison, we also performed multiple regression analysis  
108 with established diagnostic markers of diabetes (FBG, HbA1c, and PG120) as input variables  
109 (Fig. 1B). We performed this analysis using a previously described cohort consisting of 8  
110 individuals with NGT, 16 with IGT, and 29 with T2DM (Otowa-Suematsu et al., 2018).

111 The variance inflation factor (VIF) for CGM\_Mean, CGM\_Std, and AC\_Var were  
112 1.1, 1.1, and 1.0, respectively, indicating low multicollinearity among these variables. The  $R^2$   
113 of the model that predicted %NC from the three indices was 0.36. CGM\_Mean, CGM\_Std,  
114 and AC\_Var had statistically significant independent positive correlations with %NC (Fig.  
115 1A), suggesting that CGM\_Mean, CGM\_Std, and AC\_Var are independently associated  
116 with %NC. In contrast, the  $R^2$  of the model that predicted %NC from FBG, HbA1c, and  
117 PG120 was only 0.05 (Fig. 1B). Univariate and multivariate analyses including other indices  
118 further confirmed that several CGM-derived indices were significantly correlated with %NC,  
119 even after adjustment for multiple testing (Supplementary text).

120

121 **CGM-derived indices, particularly ADRR, AC\_Var, MAGE, and LI, contribute to the**  
122 **prediction of coronary plaque vulnerability**

123 To address the challenge of unstable results when dealing with numerous variables and to  
124 investigate which variables are particularly useful in estimating %NC, we used two statistical  
125 techniques: Least Absolute Shrinkage and Selection Operator (LASSO) regression and Partial  
126 Least Squares (PLS) regression (Fig. 2) (Tibshirani, 1996; Wold et al., 2001). These  
127 regression models have been used for studies where the number of input variables is large  
128 relative to the sample size (Pei et al., 2023; Wang et al., 2005).

129 LASSO uses L1 regularization to produce models with fewer parameters and has  
130 been widely used for feature selection in predictive modeling (Wei et al., 2022). We included  
131 BMI, FBG, HbA1c, OGTT-derived indices, and CGM-derived indices as the input variables.  
132 The leave-one-out cross-validation identified the optimal regularization coefficient, lambda,  
133 as 0.849 (Fig. 2A). At the lambda, the coefficients of ADRR, AC\_Var, MAGE, and LI were  
134 estimated to be non-zero coefficients (Fig. 2B, C), suggesting that CGM-derived indices,  
135 particularly ADRR, AC\_Var, MAGE, and LI, contribute to the prediction of %NC. Even with  
136 the inclusion of SBP, DBP, TG, LDL-C, and HDL-C as additional input variables, the results  
137 remained consistent, with the coefficients of ADRR, AC\_Var, MAGE, and LI still estimated  
138 as non-zero coefficients (Fig. S4).

139 To further validate the LASSO results and address potential instability, we  
140 performed PLS regression and examined the Variable Importance in Projection (VIP) scores  
141 (Fig. 2D). PLS regression is particularly useful when dealing with many input variables that  
142 may be highly collinear (Wold et al., 2001). The VIP scores of ADRR, AC\_Var, MAGE, and  
143 LI, which were estimated to be non-zero coefficients by LASSO, were higher than 1,  
144 indicating that these four variables especially contribute to the prediction of %NC.

145

146 **Three components of glucose dynamics –value, variability, and autocorrelation – are**  
147 **associated with coronary plaque vulnerability**

148 To elucidate the underlying factors of clinical parameters and their association with %NC, we  
149 performed an exploratory factor analysis. Factor analysis reduces interrelated indices into a  
150 smaller set of underlying common factors, and has been employed to examine the  
151 interdependencies among various clinical parameters (Augstein et al., 2015; Cappelleri et al.,  
152 2000; Oh et al., 2004) and DM complications (Guo et al., 2020).

153 The optimal number of underlying factors was determined using Bayesian  
154 information criterion (BIC) and minimum average partial (MAP) methods, which indicated  
155 that five and six factors were appropriate, respectively. We first set the number of underlying  
156 factors as five. Figure 3A shows that FBG, HbA1c, PG120, I.I., oral DI, CGM\_Mean,  
157 CONGA, HBGI, MVALUE, GRADE, JINDEX, and ADRR were included in the first factor.  
158 Given that most of these indices are related to the value of blood glucose concentration,  
159 factor 1 was labeled “value.” CGM\_Std, MAGE, LI, MAG, MODD, JINDEX, and ADRR  
160 were included in the second factor. Given that these indices are related to glucose variability,  
161 factor 2 was labeled “variability.” Given that the definition of JINDEX is based on the sum of  
162 CGM\_Mean and CGM\_Std, and that of ADRR is based on both high and low values of  
163 glucose, the result that JINDEX and ADRR clustered in both factors 1 and 2 is plausible.  
164 Given that autocorrelation-derived indices, AC\_Mean and AC\_Var, were included in the  
165 third factor, factor 3 was labeled “autocorrelation.” BMI, PG120, composite index, and oral  
166 DI were included in the fourth factor. Factor 4 did not include any CGM-derived indices.  
167 Given that this combination of indices indicates a decrease in oral DI and associated increase  
168 in blood glucose due to decreased insulin sensitivity, factor 4 was labeled “sensitivity  
169 (without CGM)”. PG120, I.I., oral DI, and MAG were included in the fifth factor. Factor 5  
170 did not have positive loadings of any CGM-derived indices. Given that this combination of  
171 the indices indicates a decrease in oral DI and associated increase in blood glucose due to

172 decreased insulin secretion (I.I.), factor 5 was labeled “secretion (without CGM).” The  
173 cumulative percentages of the total variance of the factors were 39%, 60%, 70%, 75%, and  
174 80%, respectively.

175 The validity of the factor analysis was assessed according to previous studies  
176 (Cappelleri et al., 2000; Guo et al., 2020). To evaluate the applicability of the factor analysis,  
177 the Kaiser-Meyer-Olkin (KMO) and Bartlett’s spherical test were performed. The KMO test  
178 indicated that the value of the measure of sampling adequacy for this data was 0.64, and  
179 Bartlett’s spherical test indicated that the variables were statistically significantly  
180 intercorrelated ( $P < 0.01$ ), suggesting that this dataset was applicable for the factor analysis.  
181 To evaluate internal consistency, Cronbach’s  $\alpha$  (Fig. 3B) and item–total correlations were  
182 calculated for each factor. Cronbach’s  $\alpha$  was 0.97 for factor 1, 0.93 for factor 2, 0.90 for  
183 factor 3, 0.72 for factor 4, and 0.66 for factor 5; these values were larger than 0.65 (Fig. 3B),  
184 suggesting that the internal consistency was satisfactory. While Cronbach’s  $\alpha$  of factor 5 was  
185 relatively low, exclusion of MAG increased the Cronbach’s  $\alpha$  to 0.84, indicating that the  
186 association between factor 5 and decrease in oral DI and associated increase in blood glucose  
187 due to decreased insulin secretion could be considered reliable. Item–total correlations ranged  
188 from 0.63 to 0.97 for factor 1, 0.72 to 0.94 for factor 2, 0.82 for factor 3, 0.54 to 0.76 for  
189 factor 4, and 0.37 to 0.86 for factor 5. With the exception of MAG, item–total correlations  
190 ranged from 0.84 to 0.91 for factor 5. The correlation coefficient of MAG was 0.37, which  
191 can be considered a modest correlation (Cappelleri et al., 2000), and the item–total  
192 correlations were generally reasonably strong in demonstrating reliability.

193 We also investigated a 6-factor solution (Fig. S5A). Factors 1, 2, and 3 could be  
194 interpreted as value, variability, and autocorrelation, respectively, similar to the 5-factor  
195 solution. Given that factor 6 had no factor loadings  $\geq 0.3$ , we applied the 5-factor solution in  
196 the subsequent analysis. Furthermore, the inclusion of SBP, DBP, TG, LDL-C, and HDL-C  
197 into the input variables did not change the presence of the three components (value,



198 variability, and autocorrelation) in glucose dynamics (Fig. S5B). Since we only included only  
199 individuals with well-controlled serum cholesterol and BP levels in this study, we applied the  
200 5-factor solution without these indices (Fig. 3A) to the following analysis.

201 To further examine the stability of the results of the factor analysis, we also  
202 conducted hierarchical clustering analysis (Fig. S6). The optimal number of clusters was  
203 determined based on silhouette analysis. A large positive silhouette coefficient indicates that  
204 each cluster is compact and distinct from the others. The analysis indicated that the four  
205 clusters were appropriate (Fig. S6A). Clusters 1, 2, and 3 can be interpreted as value,  
206 variability, and autocorrelation, respectively (Fig. S6B).

207 To investigate the association between these underlying factors and %NC, we  
208 investigated the correlation between the factor scores and %NC (Fig. 3C). The factor value  
209 and variability showed significant positive correlations with %NC, whereas autocorrelation  
210 showed a significant negative correlation. Factors 4 and 5, which were less related to the  
211 CGM-derived indices, showed weaker correlations with %NC. Collectively, we conclude that  
212 glucose dynamics has three components – value, variability, and autocorrelation – and that  
213 these three components are associated with %NC.

214 To assess the robustness and generalizability of our factor analysis results, we  
215 performed similar analyses using previously published datasets from diverse populations  
216 (Figs. S7, 8). Factors that could be interpreted as representing the value, variability, and  
217 autocorrelation of glucose dynamics were consistently observed across diverse populations,  
218 including Japanese (Sugimoto et al., 2023) (Fig. S7A), American (Hall et al., 2018) (Fig.  
219 S7B), and Chinese (Zhao et al., 2023) (Fig. S8A) cohorts. In the Chinese dataset, all three  
220 factors were significantly different between individuals with and without diabetic  
221 macrovascular complications (Fig. S8B). Taken together, these results support the  
222 reproducibility and cross-cultural validity of our three-component model of glucose  
223 dynamics.

224

225 **Overview of the three components of glucose dynamics –value, variability, and**  
226 **autocorrelation –**

227 We have shown that three components of glucose dynamics – value, variability, and  
228 autocorrelation – are associated with %NC. To overview the characteristics of glucose  
229 dynamics with different values of the components, we simulated glucose fluctuations using a  
230 previously reported mathematical model (De Gaetano and Arino, 2000) (Figs. 4, S9).

231 We could generate glucose fluctuations with almost the same standard deviation  
232 (Std) and AC\_Var but with a different mean (Fig. 4A). Similarly, we could also simulate  
233 glucose fluctuations with almost the same mean and AC\_Var but different Std, and with  
234 almost the same mean and Std but different AC\_Var. These three components were  
235 independently adjustable by changing parameters within the range of values for NGT  
236 individuals (Fig. S9B). Individuals with higher AC\_Var tended to have higher %NC (Fig. 1);  
237 however, comparing the glucose dynamics with higher and lower AC\_Var, the maximum  
238 value of blood glucose was lower in individuals with higher AC\_Var (Fig. 4A).

239 To facilitate a more comprehensive exploration of the three components of glucose  
240 dynamics, we developed a web-based application (<https://simulator-glucose.streamlit.app/>)  
241 using a more detailed mathematical model (Dalla Man et al., 2007). This model incorporates  
242 additional physiological parameters and allows for a more comprehensive simulation of  
243 glucose-insulin interactions. The web application allows users to manipulate a wide range of  
244 parameters, including insulin sensitivity, beta cell function, and insulin clearance. By  
245 systematically varying these parameters, users can examine how the Mean, Std, and AC\_Var  
246 of glucose concentrations change under different conditions.

247 We also investigated the relationship between the three components and shapes of  
248 the glucose response curve after OGTT. Patterns of the glucose response curve after OGTT  
249 were heterogeneous, and four distinct patterns, denoted class 1–4, were previously identified

250 by analyzing the glucose dynamics of 5861 individuals in Denmark (Fig. 4B) (Hulman et al.,  
251 2018). The classes with a high mean did not necessarily have high Std or AC\_Var (Fig. 4C).  
252 The classes with high Std did not necessarily have high mean and AC\_Var (Fig. 4C),  
253 consistent with the result that mean, Std, and AC\_Var had low multicollinearity with each  
254 other. Compared to class 2, only class 1 was lower in mean and Std, and was higher in  
255 AC\_Var. Compared to class 2, only class 3 was higher in mean, Std, and AC\_Var. Compared  
256 to class 2, only class 4 was higher in mean and Std, and lower in AC\_Var. Collectively, the  
257 three components could characterize the previously reported four distinct patterns during  
258 OGTT.

259         Class 3 was characterized by normal FBG and PG120 values, but is reportedly  
260 associated with increased risk of diabetes and higher all-cause mortality rate, suggesting that  
261 subgroups at high risk may not be identified by investigating only FBG and PG120 (Hulman  
262 et al., 2018). Std and AC\_Var were high in class 3 (Fig. 4C), suggesting that high Std and  
263 high AC\_Var indicate glycemc disability independent of FBG and PG120.

264

## 265 **DISCUSSION**

266 Here, we identified three distinct components of glucose dynamics: value, variability, and  
267 autocorrelation, each independently associated with coronary plaque vulnerability. We  
268 previously reported that AC\_Var, an index reflecting autocorrelation, can detect decreased  
269 abilities in glucose regulation independently of other CGM-derived indices including  
270 CGM\_Mean and CGM\_Std, which reflect value and variability components, respectively  
271 (Sugimoto et al., 2023). Diabetes diagnosis has been based on elevated FBG, PG120, and  
272 HbA1c levels. However, these indices primarily reflect only the value component of glucose  
273 dynamics, and consequently the predictive performance of the prediction model for %NC  
274 using FBG, PG120, and HbA1c was relatively modest compared to that of the model using  
275 all three components of glucose dynamics. This result is partially consistent with a previous

276 notion that glucose dynamics include two components: amplitude and timing (Cobelli and  
277 Facchinetti, 2018). Collectively, CGM-derived indices reflecting the three components of  
278 glucose dynamics – value, variability, and autocorrelation – can outperform indices used to  
279 diagnose diabetes reflecting only the value component in predicting glycemic control  
280 capacity and coronary plaque vulnerability.

281 We also showed that CGM-derived indices, especially ADRR and AC\_Var,  
282 contribute to the prediction of %NC by using LASSO and PLS (Fig. 2). Given that the  
283 definition equation for ADRR is affected by both high and low concentrations of blood  
284 glucose (Hill et al., 2011), it is likely affected by both glucose concentration values and  
285 glycemic variability. Factor analysis (Fig. 3) also showed that ADRR was included in both  
286 factor 1 (value) and factor 2 (variability). Since three factors, value, variability, and  
287 autocorrelation, contribute independently to the prediction of the complication, it would be  
288 useful to examine ADRR, which is influenced by both value and variability, and AC\_Var,  
289 which is influenced by autocorrelation, in predicting %NC with a minimal number of  
290 variables. Therefore, the result of the LASSO showing that ADRR and AC\_Var are  
291 particularly effective in predicting %NC is consistent with the results of the factor analysis  
292 that the three components contribute to the prediction.

293 This study also provided evidence that autocorrelation can vary independently from  
294 the value and variability components by using simulated data. As shown in Figure 4, these  
295 three components could be varied independently by simply changing the parameters related  
296 to glucose regulation within the range of NGT individuals. In addition, simulated glucose  
297 dynamics indicated that even subjects with high AC\_Var did not necessarily have high  
298 maximum and minimum blood glucose levels. This study also indicated that these three  
299 components qualitatively corresponded to the four distinct glucose patterns observed after  
300 glucose administration, which were identified in a previous study (Hulman et al., 2018).  
301 Glycemic variability is involved in T2DM complications by oxidative stress and endothelial

302 dysfunction (Ceriello et al., 2008; Monnier et al., 2008); however, the reasons why the three  
303 components, especially autocorrelation, independently contribute to the prediction remain  
304 unknown. The underlying biological mechanisms and effects of the three components on  
305 living systems need to be investigated in future studies.

306         The current study had several limitations. LASSO and factor analysis indicated that  
307 CGM-related features were particularly important in predicting %NC. However, these results  
308 do not mean that other clinical parameters do not associate with T2DM complications,  
309 because we only included subjects with well-controlled serum cholesterol and blood pressure  
310 levels in this study. A previous study identified components of interday variability and  
311 hypoglycemia in CGM-derived indices (Augstein et al., 2015) that were not observed in our  
312 analysis. This discrepancy may be due to the relatively small number of T2DM subjects in  
313 our study. We acknowledge that factor analyses of data from longer measurement periods,  
314 including more patients with T1DM and T2DM, could potentially yield different results.  
315 However, it is noteworthy that our analysis of longer-term CGM data sets from Japanese and  
316 American populations confirmed the existence of the same three factors - value, variability,  
317 and autocorrelation - in glucose dynamics. Moreover, even with the short measurement  
318 period, CGM-derived indices reflecting these three factors demonstrated superior predictive  
319 accuracy for %NC compared to traditional indices such as FBG, HbA1c, and PG120,  
320 underscoring the potential utility of CGM. Although time in range (TIR) was not included in  
321 the main analyses due to the small number of T2DM patients and the large number of patients  
322 with TIR greater than 70%, the CGM-derived indices still outperformed FBG, HbA1c, and  
323 PG120 in predicting %NC. The multiple regression analysis between factor scores and TIR  
324 showed that only factors 1 (value) and 2 (variability) were significantly associated with TIR  
325 (Fig. S10), further supporting the existence of three components in glucose dynamics and the  
326 potential value of examining AC\_Var in addition to other CGM-derived indices.

327           We acknowledge the potential concern of multiple testing in our study. However,  
328 even after adjusting for multiple comparisons, the CGM-derived indices retained significant  
329 correlations with %NC (Fig. S1). The consistency of our findings across different analytical  
330 approaches (Lasso, PLS, and factor analysis) and different data sets further supports the  
331 robustness of our conclusions regarding the characteristics of glucose dynamics. While we  
332 used methods that assume linearity, such as LASSO, we also examined nonlinear  
333 relationships using Spearman’s correlation for index relationships and factor loadings  
334 with %NC, and found significant associations. We acknowledge that some significant  
335 correlations appear to be relatively small. However, these findings, combined with our  
336 predictive models showing improved accuracy using CGM compared to traditional diabetes  
337 diagnostic indices, and the theoretical framework showing that conventional markers only  
338 consider the “value” component of glucose dynamics, can demonstrate the clinical  
339 significance. Finally, although we analyzed three different datasets with a total of 270  
340 subjects, the sample size may still be considered relatively small to comprehensively examine  
341 the relationships between the variables in this study. Larger, prospective studies are needed to  
342 provide a more accurate assessment of these variables in predicting abnormalities and to  
343 further validate our findings.

344           In conclusion, glucose dynamics has three components: value, variability, and  
345 autocorrelation. These three components are associated with coronary plaque vulnerability.  
346 CGM-derived indices reflecting these three components can be valuable predictive tools for  
347 T2DM complications, compared to conventional diabetes diagnostic markers reflecting only  
348 the value component. This new predictive model has the potential to improve the diagnosis  
349 and management of diabetes worldwide. To facilitate this CGM-derived prediction, we  
350 created a web application that performs a multiple regression model with these three  
351 components as input variables (<https://cgm-basedregression.streamlit.app/>).

352

353 **METHODS**

| <b>Key Resources Table</b> |                     |                                                                                 |                    |                               |
|----------------------------|---------------------|---------------------------------------------------------------------------------|--------------------|-------------------------------|
| <b>Reagent type</b>        | <b>Designation</b>  | <b>Source or reference</b>                                                      | <b>Identifiers</b> | <b>Additional information</b> |
| software, algorithm        | SciPy v1.10.1       | Virtanen et al., 2020                                                           |                    |                               |
| software, algorithm        | scikit-learn v1.0.2 | <a href="https://scikit-learn.org/stable/">https://scikit-learn.org/stable/</a> |                    |                               |

354

355 **Subjects and measurements**

356 This was a retrospective observational study approved by the ethics committee of Kobe  
357 University Graduate School of Medicine (UMIN000018326; Kobe, Japan), as described  
358 previously (Otowa-Suematsu et al., 2018). The study included 53 participants who underwent  
359 a 75-g oral glucose tolerance test (OGTT), continuous glucose monitoring (CGM) with the  
360 use of an iPro2 CGM system (Medtronic, Northridge, CA, USA), and percutaneous coronary  
361 intervention (PCI). During PCI, VH-IVUS was carried out to assess the plaque components.  
362 Among the 53 participants, eight, 16, and 29 individuals were categorized as having normal  
363 glucose tolerance (NGT), impaired glucose tolerance (IGT) and T2DM, respectively. Of note,  
364 with a type I error of 0.05, a power of 0.8, and an expected correlation coefficient of 0.4, a  
365 sample size of 47 was required to detect a significant difference from zero in the correlation  
366 coefficient.

367 Detailed participant characteristics have been reported in the previous study  
368 (Otowa-Suematsu et al., 2018). Briefly, participants aged 20–80 years with LDL-C levels <  
369 120 mg/dL under statin administration or < 100 mg/dL under other treatments for  
370 dyslipidemia, including lifestyle intervention, were included in this study. Participants with  
371 acute coronary syndrome, unsuitable anatomy for virtual VH-IVUS, poor imaging by

372 VH-IVUS, hemodialysis, inflammatory disease, shock, low cardiac output, or concurrent  
373 malignant disease were excluded from this study.

374 To validate the findings on glucose dynamics, the present study analyzed a  
375 previously reported data set from Japan (Sugimoto et al., 2023). The study was conducted in  
376 accordance with the Declaration of Helsinki and approved by the Kobe University Hospital  
377 Ethics Committee (Approval No. 1834). Briefly, individuals aged  $\geq 20$  years with no  
378 previous diagnosis of diabetes were recruited from Kobe University Hospital between  
379 January 2016 and March 2018. Exclusion criteria included use of medications that affect  
380 glucose metabolism (e.g., steroids,  $\beta$ -blockers), psychiatric disorders, pregnancy or lactation,  
381 and ineligibility as determined by treating physicians. Participants wore a CGM device (iPro;  
382 Medtronic, USA). The study included 52 individuals with NGT, nine with IGT, and three  
383 with T2DM.

384 Further validation of the glucose dynamics findings was performed using a  
385 previously reported CGM dataset (Dexcom G4 CGM System; Dexcom, Fort Lauderdale, FL,  
386 USA) obtained in the United States (Hall et al., 2018). The study included 53 individuals with  
387 no previous diagnosis of diabetes.

388 In addition, the present study analyzed a previously reported CGM (FreeStyle Libre  
389 H, Abbott Diabetes Care, Witney, UK) dataset from China (Zhao et al., 2023). Participants  
390 were recruited from the DiaDRIL registry at Shanghai East Hospital (September 2019 to  
391 March 2021) and Shanghai Fourth People's Hospital (June 2021 to November 2021).  
392 Inclusion criteria for this dataset were: diagnosis of diabetes according to the 1999 World  
393 Health Organization (WHO) criteria, age 18 years or older, willingness to provide informed  
394 consent, and CGM recording for at least three days. Exclusion criteria included reported  
395 alcohol or drug abuse, inability to comply with study protocols, or inability to participate as  
396 determined by the investigators. We extracted and analyzed glucose profile characteristics  
397 from the first three days of CGM data for each participant. 100 individuals with T2DM were



398 analyzed in this study. Our primary objective was to explore the relationship between the  
399 CGM-derived indices and the presence of diabetic macrovascular complications.

400

#### 401 **Calculation of clinical indices**

402 CGM-derived indices:

403 The CGM data collected in this study were obtained at different sampling frequencies in the  
404 different data sets. For the two Japanese cohorts and the American cohort, glucose  
405 measurements were collected at 5-minute intervals. In contrast, the Chinese cohort collected  
406 glucose measurements at 15-minute intervals.

407 Fourteen CGM-derived indices were evaluated in this study: twelve well-established  
408 CGM-derived indices (Hill et al., 2011) and two indices (AC\_Mean and AC\_Var) that have  
409 been reported to capture glucose handling capacity independently of the aforementioned  
410 twelve indices (Sugimoto et al., 2023). For the datasets with 5-minute sampling intervals (the  
411 two Japanese datasets and the American dataset), AC\_Mean and AC\_Var were calculated as  
412 the mean and variance of the autocorrelation functions at lags 1-30 of the glucose levels,  
413 respectively. For the data set with 15-minute sampling intervals (the Chinese data set),  
414 AC\_Mean and AC\_Var were calculated as the mean and variance of the autocorrelation  
415 functions at lags 1-10 of the glucose levels, respectively. These calculations correspond to a  
416 time window of 150 minutes. CGM\_Mean and CGM\_Std indicate the mean value and  
417 standard deviation of glucose levels measured by CGM, respectively. CONGA, LI, JINDEX,  
418 HBGI, GRADE, MODD, MAGE, ADRR, MVALUE, and MAG were calculated using  
419 EasyGV software (Hill et al., 2011). The calculating formulae of these indices are shown in  
420 Table S1.

421 In the two Japanese datasets and the American dataset, there was a relatively small  
422 proportion of T2DM patients and a substantial number of subjects with time in range (TIR)  
423 (Battelino et al., 2023; Larkin et al., 2019) values (glucose levels between 70 and 180 mg/dL)

424 greater than 70% (Hall et al., 2018; Otowa-Suematsu et al., 2018; Sugimoto et al., 2023).

425 Given this distribution, we decided not to include TIR in our primary analyses. However,  
426 given the potential interest of this metric, we provided correlations between TIR and other  
427 indices as supplementary information.

428

429 OGTT-derived indices:

430 Three OGTT-derived indices were calculated as previously described (Matsuda and  
431 DeFronzo, 1999; Otowa-Suematsu et al., 2018). The insulinogenic index (I.I.) indicates  
432 insulin secretion and is calculated from the ratio of the increment of immunoreactive insulin  
433 (IRI) to that of plasma glucose at 30 min after onset of the OGTT. The composite index  
434 indicates insulin sensitivity, which can be calculated from fasting plasma glucose, fasting IRI,  
435 mean blood glucose levels, and mean serum IRI concentrations during the OGTT. The oral  
436 disposition index (Oral DI) was calculated from the product of the composite index and the  
437 ratio of the area under the insulin concentration curve from 0 to 120 minutes to that for  
438 plasma glucose from 0 to 120 minutes, without using the data measured at 90 min, in the  
439 OGTT.

440

441 VH-IVUS-derived index:

442 VH-IVUS was carried out using the Eagle Eye Platinum 3.5-Fr 20-MHz catheter (Volcano,  
443 Rancho Cordova, CA, USA), as previously described (Otowa-Suematsu et al., 2018). The  
444 intraclass correlation coefficients for interobserver and intraobserver reliability of external  
445 elastic membrane volume were 0.95 and 0.97, respectively (Otowa-Suematsu et al., 2018),  
446 indicating high reproducibility. The VH-IVUS categorized plaque into four components:  
447 fibrous, fibrofatty, necrotic core, and dense calcium. Following the previous study, our  
448 investigation focused specifically on the ratio of necrotic core to total plaque volume (%NC),

449 a widely used parameter of plaque vulnerability. For patients with multiple plaques, the  
450 mean %NC was calculated.

451

#### 452 **Prediction models and statistical analyses**

453 In this study, we conducted multiple linear regression, LASSO regression, and PLS  
454 regression. The input variables in these models included the following 26 variables: BMI,  
455 SBP, DBP, TGs, LDL-C, HDL-C, FBG, HbA1c, PG120, I.I., composite index, oral DI,  
456 CGM\_Mean, CGM\_Std, CONGA, LI, JINDEX, HBGI, GRADE, MODD, MAGE, ADRR,  
457 MVALUE, MAG, AC\_Mean, and AC\_Var. In conducting these models, z-score  
458 normalization on each input variable was performed.

459 The predictive performance of multiple linear regression was evaluated by the  
460 coefficient of determination ( $R^2$ ), the adjusted coefficient of determination (Adj  $R^2$ ), or AIC.  
461 The multicollinearity of the input variables was estimated by VIF. LASSO regression is a  
462 kind of linear regression with L1 regularization (Tibshirani, 1996). The optimal  
463 regularization coefficient, lambda, was based on leave-one-out cross-validation and  
464 mean-squared error (MSE). The importance of the input variables in predicting %NC was  
465 evaluated by the VIP scores (Wold et al., 2001) that were generated from PLS regression.  
466 These models were conducted using scikit-learn v1.0.2, a Python-based toolkit  
467 (<https://scikit-learn.org/stable/>).

468 Relationships among indices were also evaluated using Spearman's correlation  
469 coefficients ( $r$ ), and the correlation coefficients were reported with 95% CIs through  
470 bootstrap resampling. The number of resamples performed to form the distribution was set at  
471 10000. Benjamini–Hochberg's multiple comparison test was also performed with a  
472 significance threshold of  $Q < 0.05$ .

473

#### 474 **Factor analysis and hierarchical clustering analysis**

475 The intercorrelations of the clinical parameters and their associations with %NC were  
476 assessed using exploratory factor analyses and hierarchical clustering analyses. We followed  
477 the previously reported approach (Cappelleri et al., 2000; Guo et al., 2020; Lakka et al., 2002;  
478 Oh et al., 2004) with some modifications in conducting our exploratory factor analyses. BIC  
479 and MAP methods were used to determine the number of underlying factors. Variables with  
480 factor loadings of  $\geq 0.30$  were used in interpretation. To improve the interpretation,  
481 orthogonal (varimax) rotation was used. To evaluate the applicability of the factor analysis,  
482 KMO and Bartlett's spherical test were performed. To evaluate internal consistency of each  
483 factor, Cronbach's  $\alpha$  and item-total correlations were calculated. The association of the factor  
484 scores with %NC was assessed using Spearman's correlation.

485 Hierarchical clustering analysis was conducted using a method that combines a  
486 Euclidean distance measure and Ward linkage. I.I., composite index, oral DI, and AC\_Mean  
487 were inverted negatively so that the value of indices increased in subjects with abnormalities.  
488 The quality of the hierarchical clustering analysis was evaluated based on silhouette analysis  
489 (Rousseeuw, 1987). These analyses were performed after Z score normalization using  
490 scikit-learn v1.0.2, a Python-based toolkit (<https://scikit-learn.org/stable/>).

491

## 492 **Mathematical models used for simulating the characteristics of glucose dynamics**

493 In simulating the characteristics of glucose dynamics, we used a simple and stable model (De  
494 Gaetano and Arino, 2000), which can be written as follows:

$$\frac{dG}{dt} = -k_{glu}G - k_{sen}IG + k_{pro} + f$$
$$\frac{dI}{dt} = \frac{k_{sec}}{k_{tim}} \int_{t-k_{tim}}^t G ds - k_{cle}I$$

495 where the variables  $G$  and  $I$  denote blood glucose and insulin concentrations, respectively.

496 We simulated 240-minutes profiles of  $G$ , and calculated the mean, Std, and AC\_Var of  $G$ .

497 The parameters were changed within the range participants could take (De Gaetano and

498 Arino, 2000). Five mg/dL/min glucose was applied for 10 minutes at 30 minutes as the  
499 external input of glucose  $f$ .

500 For more detailed simulations of the postprandial response, we used a complex,  
501 fine-grained model (Dalla Man et al., 2007). Briefly, the model consists of two  
502 interconnected subsystems: the glucose subsystem and the insulin subsystem. The glucose  
503 subsystem is represented by a two-compartment model. The first compartment ( $G_p$ )  
504 represents glucose in plasma and rapidly equilibrating tissues, while the second compartment  
505 ( $G_t$ ) represents glucose in slowly equilibrating tissues. The dynamics of this subsystem is  
506 described by the differential equations, as follows:

$$\frac{dG_p}{dt} = -k_1 G_p + k_2 G_t + \text{EGP}(t) + \text{Ra}(t) - U_{ii}(t) - E(t)$$

$$\frac{dG_t}{dt} = k_1 G_p - k_2 G_t - U_{id}(t)$$

$$\frac{dG}{dt} = \frac{G_p}{V_G}$$

507 In these equations,  $k_1$  and  $k_2$  are rate constants, EGP is endogenous glucose production,  
508 Ra is the rate of glucose appearance from meal absorption,  $U_{ii}$  is insulin-independent  
509 glucose utilization,  $E$  is renal excretion,  $U_{id}$  is insulin-dependent glucose utilization,  $G$  is  
510 plasma glucose concentration, and  $V_G$  is the distribution volume of glucose.

511 The insulin subsystem is also modeled with two compartments, one for plasma  
512 insulin ( $I_p$ ) and another for liver insulin ( $I_l$ ). The dynamics of this subsystem is described by  
513 the differential equations, as follows:

$$\frac{dI_l}{dt} = -(m_1 + m_3)I_l + m_2 I_p + S(t)$$

$$\frac{dI_p}{dt} = -(m_2 + m_4)I_p + m_1 I_l,$$

514 where,  $S$  is the insulin secretion rate,  $m_1$ ,  $m_2$ , and  $m_4$  are rate parameters,  $m_4$  is  
515 peripheral insulin clearance. For simplicity, we assumed that insulin sensitivity and beta cell  
516 responsivity to glucose are constant. We simulated 48-hour profiles of  $G$ , and calculated the

517 Mean, Std, and AC\_Var of  $G$ . The code that simulates the glucose dynamics is available  
518 from the repository (<https://github.com/HikaruSugimoto/Simulator>) and the web application  
519 (<https://simulator-glucose.streamlit.app/>). The simulations were conducted using SciPy  
520 v1.10.1 (Virtanen et al., 2020).

521

## 522 **Characterization of glucose patterns during the OGTT**

523 We investigated the characteristics of previously reported glucose patterns during the OGTT  
524 (Hulman et al., 2018). In the study, 5861 subjects without diabetes in Denmark underwent the  
525 OGTT with measurements of glucose levels at three time points (0, 30, and 120 min), and  
526 four distinct glucose patterns associated with long-term outcomes including diabetes onset,  
527 cardiovascular disease, and all-cause mortality rate were identified. For the calculation of  
528 mean, Std, and AC\_Var of glucose levels, each time point was linearly imputed. Here,  
529 AC\_Var was calculated from the autocorrelation function at lags 1–20, as we had glucose  
530 data available for only 2 h after the OGTT.

531

## 532 **Acknowledgments**

533 **Author Contributions.** H.S. analyzed the data. H.S., K.H., T.Y., N.O.S., Y.H., H.O., K.H.,  
534 K.S., W.O., and S.K. wrote the manuscript. W.O. and S.K. supervised the study.

535 **Conflict of Interest.** The authors have no conflicts of interest to declare.

536 **Funding and Assistance.** This study was supported by the Japan Society for the Promotion  
537 of Science (JSPS) KAKENHI (JP21H04759), CREST, the Japan Science and Technology  
538 Agency (JST) (JPMJCR2123), The Uehara Memorial Foundation, and The Takeda Science  
539 Foundation.

## 540 **Data and code availability**

541 We used only previously published data sets. The code that calculates AC\_Mean and  
542 AC\_Var and that performs regression analysis with CGM-derived indices as input variables

543 are available from the repository ([https://github.com/HikaruSugimoto/CGM\\_regression\\_app](https://github.com/HikaruSugimoto/CGM_regression_app))

544 and the web application (<https://cgm-basedregression.streamlit.app/>).

545

546 **Figure Legends**

547 **Figure 1. Multiple regression analyses for predicting %NC.**

548 Multiple regression analysis between %NC and CGM\_Mean, CGM\_Std, and AC\_Var (A).

549 That between %NC and FBG, HbA1c, and PG120 (B). Scatter plots for predicted %NC versus

550 measured %NC (the left). Each point corresponds to the values for a single subject. Bars

551 represent the 95% CIs of the coefficients of the regression models (the right).

552

553 **Figure 2. LASSO and PLS regression analyses for predicting %NC.**

554 (A) Relationship between regularization coefficients ( $\lambda$ ) and the MSE based on the

555 leave-one-out cross-validation in predicting %NC. Dotted vertical line indicates the optimal

556  $\lambda$ , which provides the least MSE. The optimal  $\lambda$  was 0.849.

557 (B) LASSO regularization paths along the  $\lambda$  in predicting %NC. Cyan, magenta, and

558 gray lines indicate the estimated coefficients of AC\_Mean, AC\_Var, and the other input

559 variables, respectively. Dotted vertical line indicates the optimal  $\lambda$ .

560 (C) Estimated coefficients with the optimal  $\lambda$ . Only variables with non-zero coefficients

561 are shown. Input variables include the following 21 variables: BMI, FBG, HbA1c, PG120,

562 I.I., composite index, oral DI, CGM\_Mean, CGM\_Std, CONGA, LI, JINDEX, HBGI,

563 GRADE, MODD, MAGE, ADRR, MVALUE, MAG, AC\_Mean, and AC\_Var.

564 (D) VIP generated from the PLS regression predicting %NC. Variables with a  $VIP \geq 1$  (the

565 dotted line) were considered to significantly contribute to the prediction.

566

567 **Figure 3. Factor analysis of the clinical parameters.**

568 (A) Factor analysis after orthogonal rotation. The values and colors were based on the factor

569 loadings. The columns represent each factor. The rows represent input indices.

570 (B) Cronbach's  $\alpha$  for each factor. Bars represent the 95% CI.



571 (C) Scatter plots and fitted linear regression lines for factor scores versus %NC. Each point  
572 corresponds to the values for a single subject.  $r$  is Spearman's correlation coefficient, and the  
573 value in parentheses is the 95% CI.

574

575 **Figure 4. Overview of the three components of glucose dynamics.**

576 (A) 240 min simulated glucose concentration. The colors of the line are based on the mean  
577 value (Mean), Std, and AC\_Var of the simulated blood glucose. Red and gray dotted  
578 horizontal lines indicate the minimum or maximum values of blood glucose, respectively.

579 (B) Previously reported patterns of blood glucose during the OGTT (Hulman et al., 2018).

580 Green, class 1; light blue, class 2; dark blue, class 3; red, class 4.

581 (C) Mean, Std, and AC\_Var of the glucose during the OGTT. Colors are based on the class  
582 shown in Figure 4B.

583 **References**

- 584 Augstein P, Heinke P, Vogt L, Vogt R, Rackow C, Kohnert K-D, Salzsieder E. 2015.  
585 Q-Score: development of a new metric for continuous glucose monitoring that enables  
586 stratification of antihyperglycaemic therapies. *BMC Endocr Disord* **15**:22.
- 587 Battelino T, Alexander CM, Amiel SA, Arreaza-Rubin G, Beck RW, Bergenstal RM,  
588 Buckingham BA, Carroll J, Ceriello A, Chow E, Choudhary P, Close K, Danne T,  
589 Dutta S, Gabbay R, Garg S, Heverly J, Hirsch IB, Kader T, Kenney J, Kovatchev B,  
590 Laffel L, Maahs D, Mathieu C, Mauricio D, Nimri R, Nishimura R, Scharf M, Del  
591 Prato S, Renard E, Rosenstock J, Saboo B, Ueki K, Umpierrez GE, Weinzimer SA,  
592 Phillip M. 2023. Continuous glucose monitoring and metrics for clinical trials: an  
593 international consensus statement. *Lancet Diabetes Endocrinol* **11**:42–57.
- 594 Bax JJ, Young LH, Frye RL, Bonow RO, Steinberg HO, Barrett EJ, ADA. 2007. Screening  
595 for coronary artery disease in patients with diabetes. *Diabetes Care* **30**:2729–2736.
- 596 Cai J, Yang Q, Lu J, Shen Y, Wang C, Chen L, Zhang L, Lu W, Zhu W, Xia T, Zhou J. 2022.  
597 Impact of the complexity of glucose time series on all-cause mortality in patients with  
598 type 2 diabetes. *J Clin Endocrinol Metab*. doi:10.1210/clinem/dgac692
- 599 Cappelleri JC, Gerber RA, Kourides IA, Gelfand RA. 2000. Development and factor analysis  
600 of a questionnaire to measure patient satisfaction with injected and inhaled insulin for  
601 type 1 diabetes. *Diabetes Care* **23**:1799–1803.
- 602 Ceriello A, Esposito K, Piconi L, Ihnat MA, Thorpe JE, Testa R, Boemi M, Giugliano D.  
603 2008. Oscillating glucose is more deleterious to endothelial function and oxidative  
604 stress than mean glucose in normal and type 2 diabetic patients. *Diabetes*  
605 **57**:1349–1354.
- 606 Cobelli C, Facchinetti A. 2018. Yet Another Glucose Variability Index: Time for a Paradigm  
607 Change? *Diabetes Technol Ther* **20**:1–3.
- 608 Dalla Man C, Rizza RA, Cobelli C. 2007. Meal simulation model of the glucose-insulin  
609 system. *IEEE Trans Biomed Eng* **54**:1740–1749.
- 610 De Gaetano A, Arino O. 2000. Mathematical modelling of the intravenous glucose tolerance  
611 test. *J Math Biol* **40**:136–168.
- 612 Fabris C, Facchinetti A, Fico G, Sambo F, Arredondo MT, Cobelli C, MOSAIC EU Project  
613 Consortium. 2015. Parsimonious Description of Glucose Variability in Type 2  
614 Diabetes by Sparse Principal Component Analysis. *J Diabetes Sci Technol*  
615 **10**:119–124.
- 616 Fabris C, Facchinetti A, Sparacino G, Zanon M, Guerra S, Maran A, Cobelli C. 2014.  
617 Glucose variability indices in type 1 diabetes: parsimonious set of indices revealed by  
618 sparse principal component analysis. *Diabetes Technol Ther* **16**:644–652.

- 619 Fiarni C, Sipayung EM, Maemunah S. 2019. Analysis and Prediction of Diabetes  
620 Complication Disease using Data Mining Algorithm. *Procedia Comput Sci*  
621 **161**:449–457.
- 622 Gerbaud E, Darier R, Montaudon M, Beauvieux M-C, Coffin-Boutreux C, Coste P, Douard H,  
623 Ouattara A, Catargi B. 2019. Glycemic Variability Is a Powerful Independent  
624 Predictive Factor of Midterm Major Adverse Cardiac Events in Patients With  
625 Diabetes With Acute Coronary Syndrome. *Diabetes Care* **42**:674–681.
- 626 Gorst C, Kwok CS, Aslam S, Buchan I, Kontopantelis E, Myint PK, Heatlie G, Loke Y,  
627 Rutter MK, Mamas MA. 2015. Long-term Glycemic Variability and Risk of Adverse  
628 Outcomes: A Systematic Review and Meta-analysis. *Diabetes Care* **38**:2354–2369.
- 629 Guo W, Zhou Q, Jia Y, Xu J. 2020. Cluster and Factor Analysis of Elements in Serum and  
630 Urine of Diabetic Patients with Peripheral Neuropathy and Healthy People. *Biol Trace*  
631 *Elem Res* **194**:48–57.
- 632 Hall H, Perelman D, Breschi A, Limcaoco P, Kellogg R, McLaughlin T, Snyder M. 2018.  
633 Glucotypes reveal new patterns of glucose dysregulation. *PLoS Biol* **16**:e2005143.
- 634 Hill NR, Oliver NS, Choudhary P, Levy JC, Hindmarsh P, Matthews DR. 2011. Normal  
635 reference range for mean tissue glucose and glycemic variability derived from  
636 continuous glucose monitoring for subjects without diabetes in different ethnic groups.  
637 *Diabetes Technol Ther* **13**:921–928.
- 638 Hulman A, Vistisen D, Glümer C, Bergman M, Witte DR, Færch K. 2018. Glucose patterns  
639 during an oral glucose tolerance test and associations with future diabetes,  
640 cardiovascular disease and all-cause mortality rate. *Diabetologia* **61**:101–107.
- 641 Keshet A, Shilo S, Godneva A, Talmor-Barkan Y, Aviv Y, Segal E, Rossman H. 2023.  
642 CGMap: Characterizing continuous glucose monitor data in thousands of non-diabetic  
643 individuals. *Cell Metab* **35**:758-769.e3.
- 644 Lakka H-M, Laaksonen DE, Lakka TA, Niskanen LK, Kumpusalo E, Tuomilehto J, Salonen  
645 JT. 2002. The metabolic syndrome and total and cardiovascular disease mortality in  
646 middle-aged men. *JAMA* **288**:2709–2716.
- 647 Larkin ME, Nathan DM, Bebu I, Krause-Steinrauf H, Herman WH, Higgins JM, Tiktin M,  
648 Cohen RM, Lund C, Bergenstal RM, Johnson ML, Arends V, GRADE Research  
649 Group. 2019. Rationale and Design for a GRADE Substudy of Continuous Glucose  
650 Monitoring. *Diabetes Technol Ther* **21**:682–690.
- 651 Matsuda M, DeFronzo RA. 1999. Insulin sensitivity indices obtained from oral glucose  
652 tolerance testing: comparison with the euglycemic insulin clamp. *Diabetes Care*  
653 **22**:1462–1470.
- 654 Monnier L, Colette C, Owens DR. 2008. Glycemic variability: the third component of the  
655 dysglycemia in diabetes. Is it important? How to measure it? *J Diabetes Sci Technol*  
656 **2**:1094–1100.

- 657 Oh J-Y, Hong YS, Sung Y-A, Barrett-Connor E. 2004. Prevalence and factor analysis of  
658 metabolic syndrome in an urban Korean population. *Diabetes Care* **27**:2027–2032.
- 659 Okada K, Hibi K, Gohbara M, Kataoka S, Takano K, Akiyama E, Matsuzawa Y, Saka K,  
660 Maejima N, Endo M, Iwahashi N, Tsukahara K, Kosuge M, Ebina T, Fitzgerald PJ,  
661 Honda Y, Umemura S, Kimura K. 2015. Association between blood glucose  
662 variability and coronary plaque instability in patients with acute coronary syndromes.  
663 *Cardiovasc Diabetol* **14**:111.
- 664 Otowa-Suematsu N, Sakaguchi K, Komada H, Nakamura T, Sou A, Hirota Y, Kuroda M,  
665 Shinke T, Hirata K-I, Ogawa W. 2018. Comparison of the relationship between  
666 multiple parameters of glycemic variability and coronary plaque vulnerability  
667 assessed by virtual histology-intravascular ultrasound. *J Diabetes Investig* **9**:610–615.
- 668 Pei X, Qi D, Liu J, Si H, Huang S, Zou S, Lu D, Li Z. 2023. Screening marker genes of type  
669 2 diabetes mellitus in mouse lacrimal gland by LASSO regression. *Sci Rep* **13**:6862.
- 670 Psoma O, Makris M, Tselepis A, Tsimihodimos V. 2022. Short-term Glycemic Variability  
671 and Its Association With Macrovascular and Microvascular Complications in Patients  
672 With Diabetes. *J Diabetes Sci Technol* 19322968221146810.
- 673 Ravaut M, Sadeghi H, Leung KK, Volkovs M, Kornas K, Harish V, Watson T, Lewis GF,  
674 Weisman A, Poutanen T, Rosella L. 2021. Predicting adverse outcomes due to  
675 diabetes complications with machine learning using administrative health data. *NPJ*  
676 *Digit Med* **4**:24.
- 677 Rousseeuw PJ. 1987. Silhouettes: A graphical aid to the interpretation and validation of  
678 cluster analysis. *J Comput Appl Math* **20**:53–65.
- 679 Selvin E, Steffes MW, Zhu H, Matsushita K, Wagenknecht L, Pankow J, Coresh J, Brancati  
680 FL. 2010. Glycated hemoglobin, diabetes, and cardiovascular risk in nondiabetic  
681 adults. *N Engl J Med* **362**:800–811.
- 682 Service FJ. 2013. Glucose variability. *Diabetes* **62**:1398–1404.
- 683 Su G, Mi S, Tao H, Li Z, Yang H, Zheng H, Zhou Y, Ma C. 2011. Association of glycemic  
684 variability and the presence and severity of coronary artery disease in patients with  
685 type 2 diabetes. *Cardiovasc Diabetol* **10**:19.
- 686 Sugimoto H, Hironaka K-I, Nakamura T, Yamada T, Miura H, Otowa-Suematsu N, Fujii M,  
687 Hirota Y, Sakaguchi K, Ogawa W, Others. 2023. Improved Detection of Decreased  
688 Glucose Handling Capacities via Novel Continuous Glucose Monitoring-Derived  
689 Indices: AC\_Mean and AC\_Var. *medRxiv* 2023–2009.
- 690 Tang X, Li S, Wang Y, Wang M, Yin Q, Mu P, Lin S, Qian X, Ye X, Chen Y. 2016.  
691 Glycemic variability evaluated by continuous glucose monitoring system is associated  
692 with the 10-y cardiovascular risk of diabetic patients with well-controlled HbA1c.  
693 *Clin Chim Acta* **461**:146–150.

- 694 Tibshirani R. 1996. Regression shrinkage and selection via the lasso. *J R Stat Soc*  
695 **58**:267–288.
- 696 Utzschneider KM, Prigeon RL, Faulenbach MV, Tong J, Carr DB, Boyko EJ, Leonetti DL,  
697 McNeely MJ, Fujimoto WY, Kahn SE. 2009. Oral disposition index predicts the  
698 development of future diabetes above and beyond fasting and 2-h glucose levels.  
699 *Diabetes Care* **32**:335–341.
- 700 Virtanen P, Gommers R, Oliphant TE, Haberland M, Reddy T, Cournapeau D, Burovski E,  
701 Peterson P, Weckesser W, Bright J, van der Walt SJ, Brett M, Wilson J, Millman KJ,  
702 Mayorov N, Nelson ARJ, Jones E, Kern R, Larson E, Carey CJ, Polat İ, Feng Y,  
703 Moore EW, VanderPlas J, Laxalde D, Perktold J, Cimrman R, Henriksen I, Quintero  
704 EA, Harris CR, Archibald AM, Ribeiro AH, Pedregosa F, van Mulbregt P, SciPy 1.0  
705 Contributors. 2020. SciPy 1.0: fundamental algorithms for scientific computing in  
706 Python. *Nat Methods* **17**:261–272.
- 707 Wang C, Kong H, Guan Y, Yang J, Gu J, Yang S, Xu G. 2005. Plasma phospholipid  
708 metabolic profiling and biomarkers of type 2 diabetes mellitus based on  
709 high-performance liquid chromatography/electrospray mass spectrometry and  
710 multivariate statistical analysis. *Anal Chem* **77**:4108–4116.
- 711 Wei H, Sun J, Shan W, Xiao W, Wang B, Ma X, Hu W, Wang X, Xia Y. 2022.  
712 Environmental chemical exposure dynamics and machine learning-based prediction of  
713 diabetes mellitus. *Sci Total Environ* **806**:150674.
- 714 Wold S, Sjöström M, Eriksson L. 2001. PLS-regression: a basic tool of chemometrics.  
715 *Chemometrics Intellig Lab Syst* **58**:109–130.
- 716 Young LH, Wackers FJT, Chyun DA, Davey JA, Barrett EJ, Taillefer R, Heller GV,  
717 Iskandrian AE, Wittlin SD, Filipchuk N, Ratner RE, Inzucchi SE, DIAD Investigators.  
718 2009. Cardiac outcomes after screening for asymptomatic coronary artery disease in  
719 patients with type 2 diabetes: the DIAD study: a randomized controlled trial. *JAMA*  
720 **301**:1547–1555.
- 721 Zhao Q, Zhu J, Shen X, Lin C, Zhang Y, Liang Y, Cao B, Li J, Liu X, Rao W, Wang C. 2023.  
722 Chinese diabetes datasets for data-driven machine learning. *Sci Data* **10**:35.
- 723 Zhou JJ, Schwenke DC, Bahn G, Reaven P, VADT Investigators. 2018. Glycemic Variation  
724 and Cardiovascular Risk in the Veterans Affairs Diabetes Trial. *Diabetes Care*  
725 **41**:2187–2194.

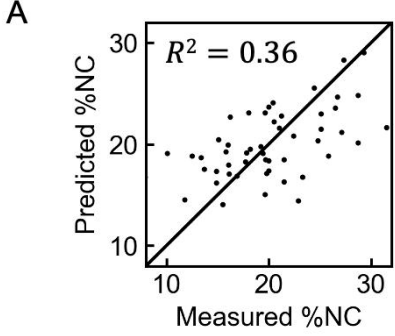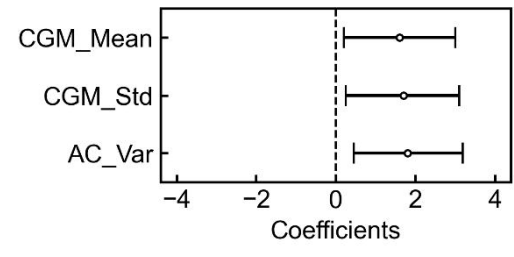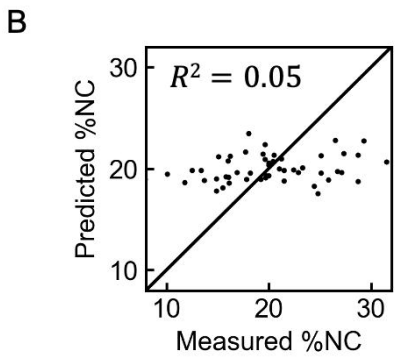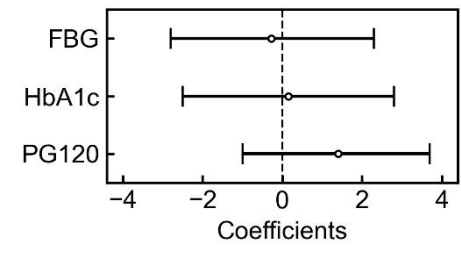

Fig. 1

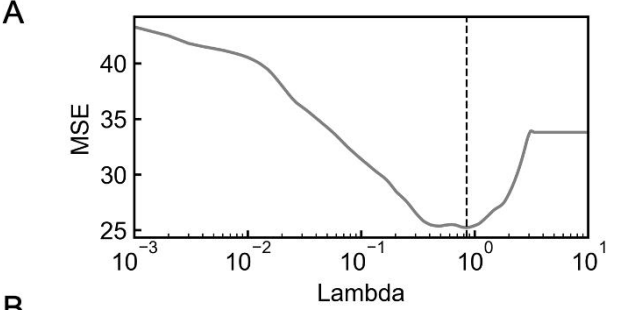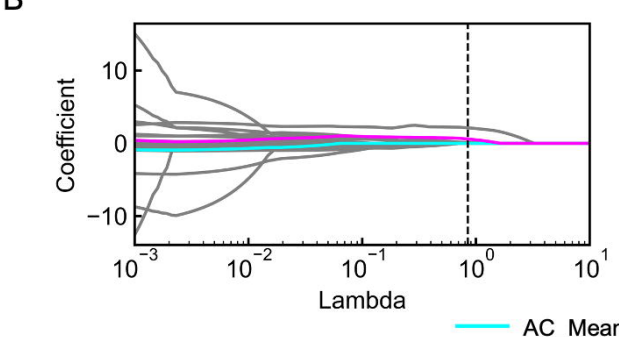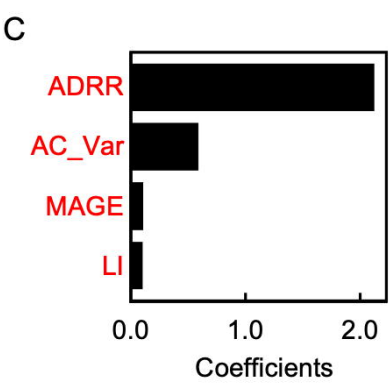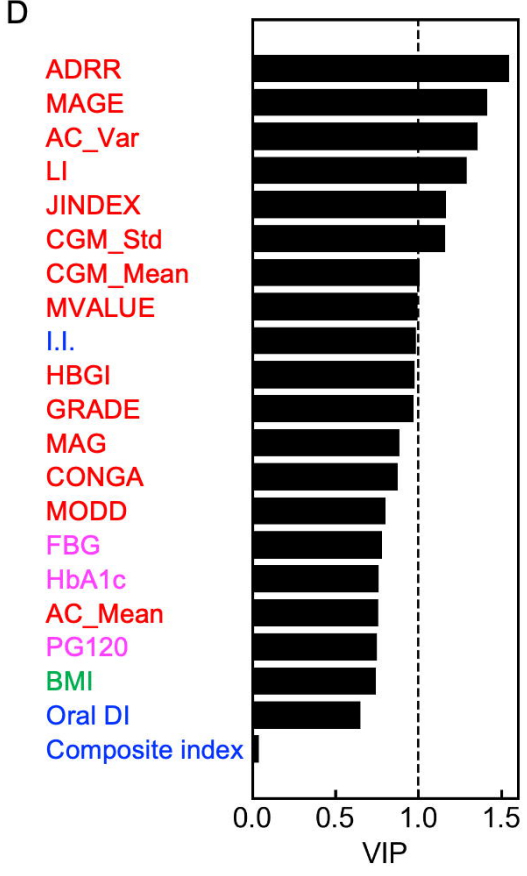

Fig. 2



A

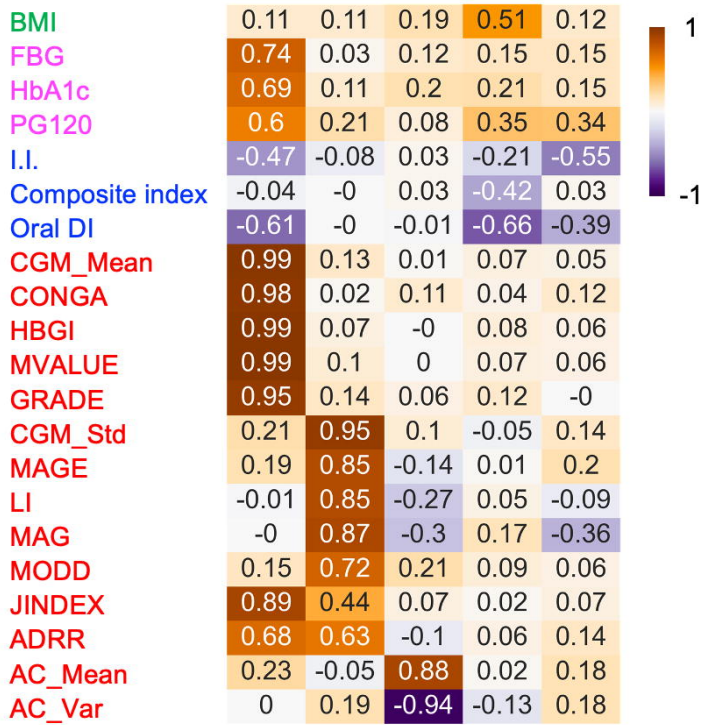

1, Value  
 2, Variability  
 3, Autocorrelation  
 4, Sensitivity (without CGM)  
 5, Secretion (without CGM)

B

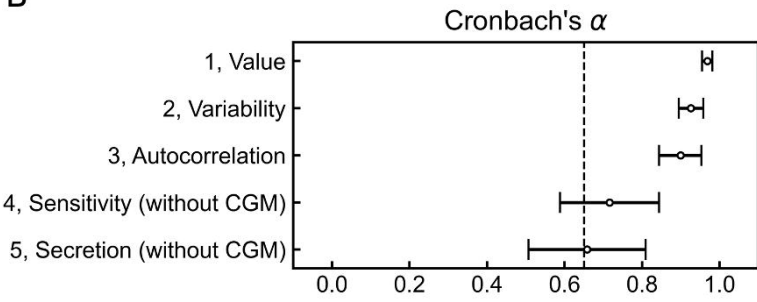

C

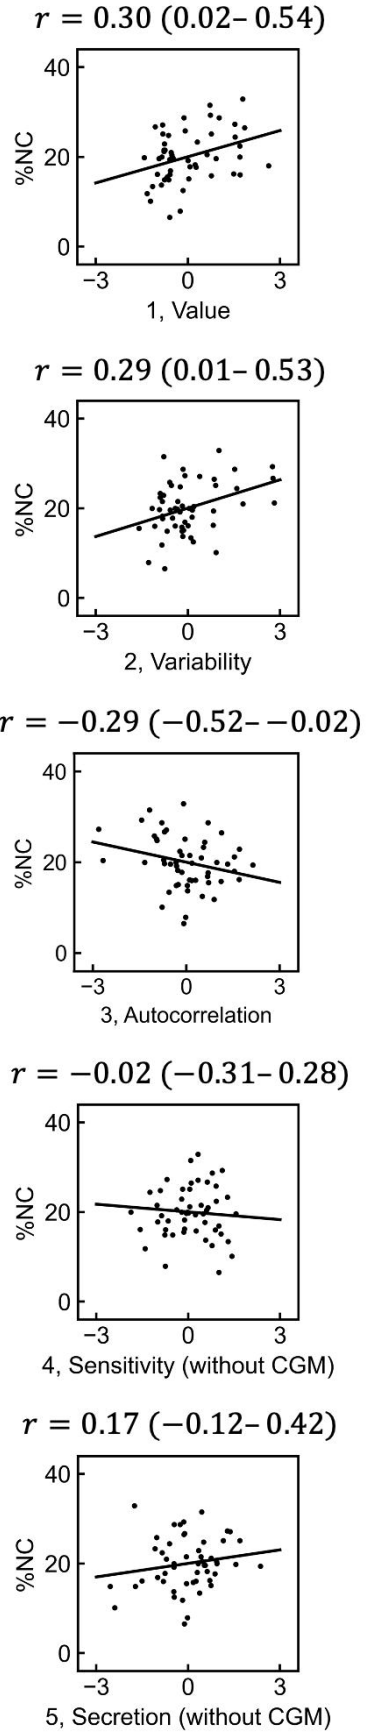

Fig. 3



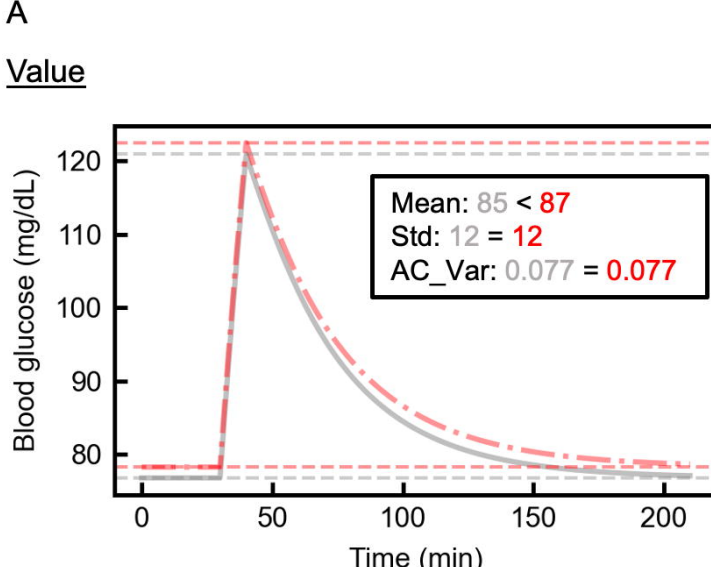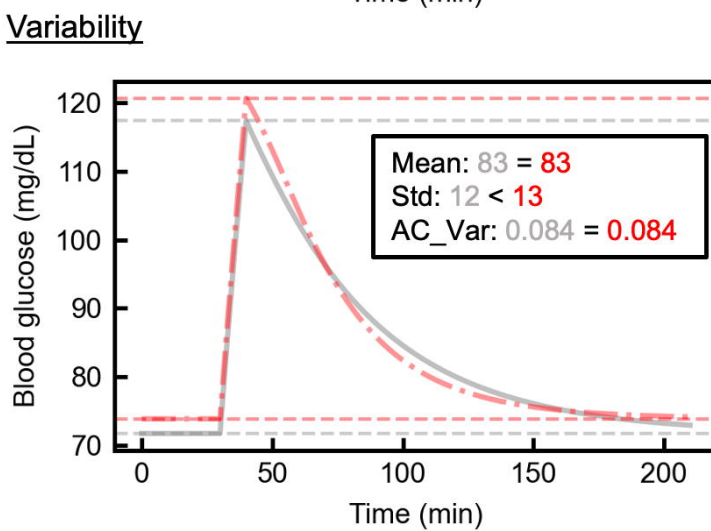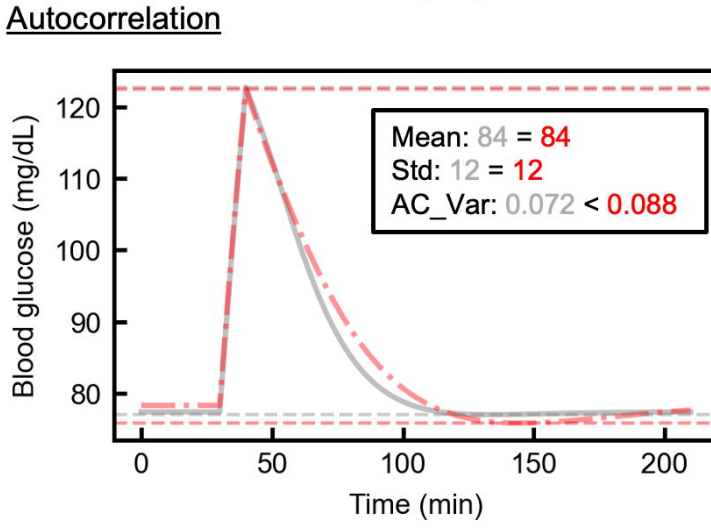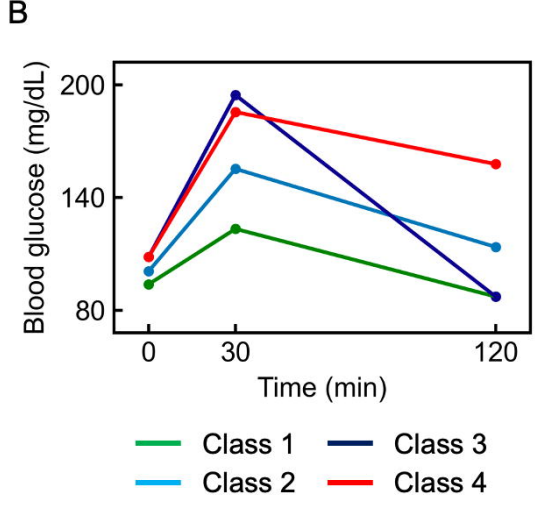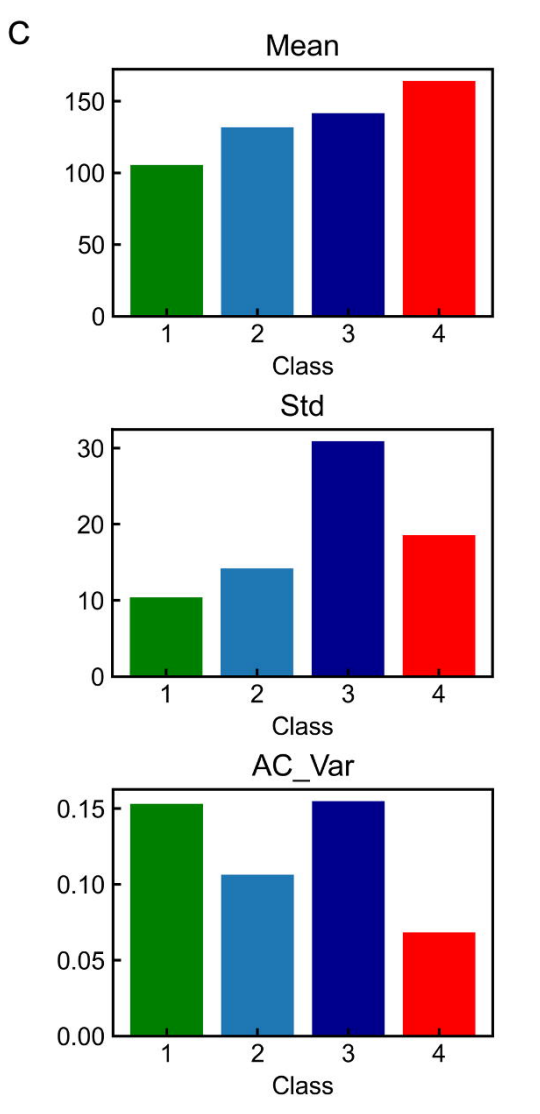

Fig. 4
